# Supplementary material
Source: PubMed Central journal article supplement (PMC7867643)
Supplement: NIHMS1646312-supplement-1-s2_0-S1934590920305075-mmc1.pdf [file NIHMS1646312-supplement-1-s2_0-S1934590920305075-mmc1.pdf]

**Cell Stem Cell, Volume 28**

## **Supplemental Information**

### **Capturing Cardiogenesis in Gastruloids**

**Giuliana Rossi, Nicolas Broguiere, Matthew Miyamoto, Andrea Boni, Romain  
Guet, Mehmet Girgin, Robert G. Kelly, Chulan Kwon, and Matthias P. Lutolf**

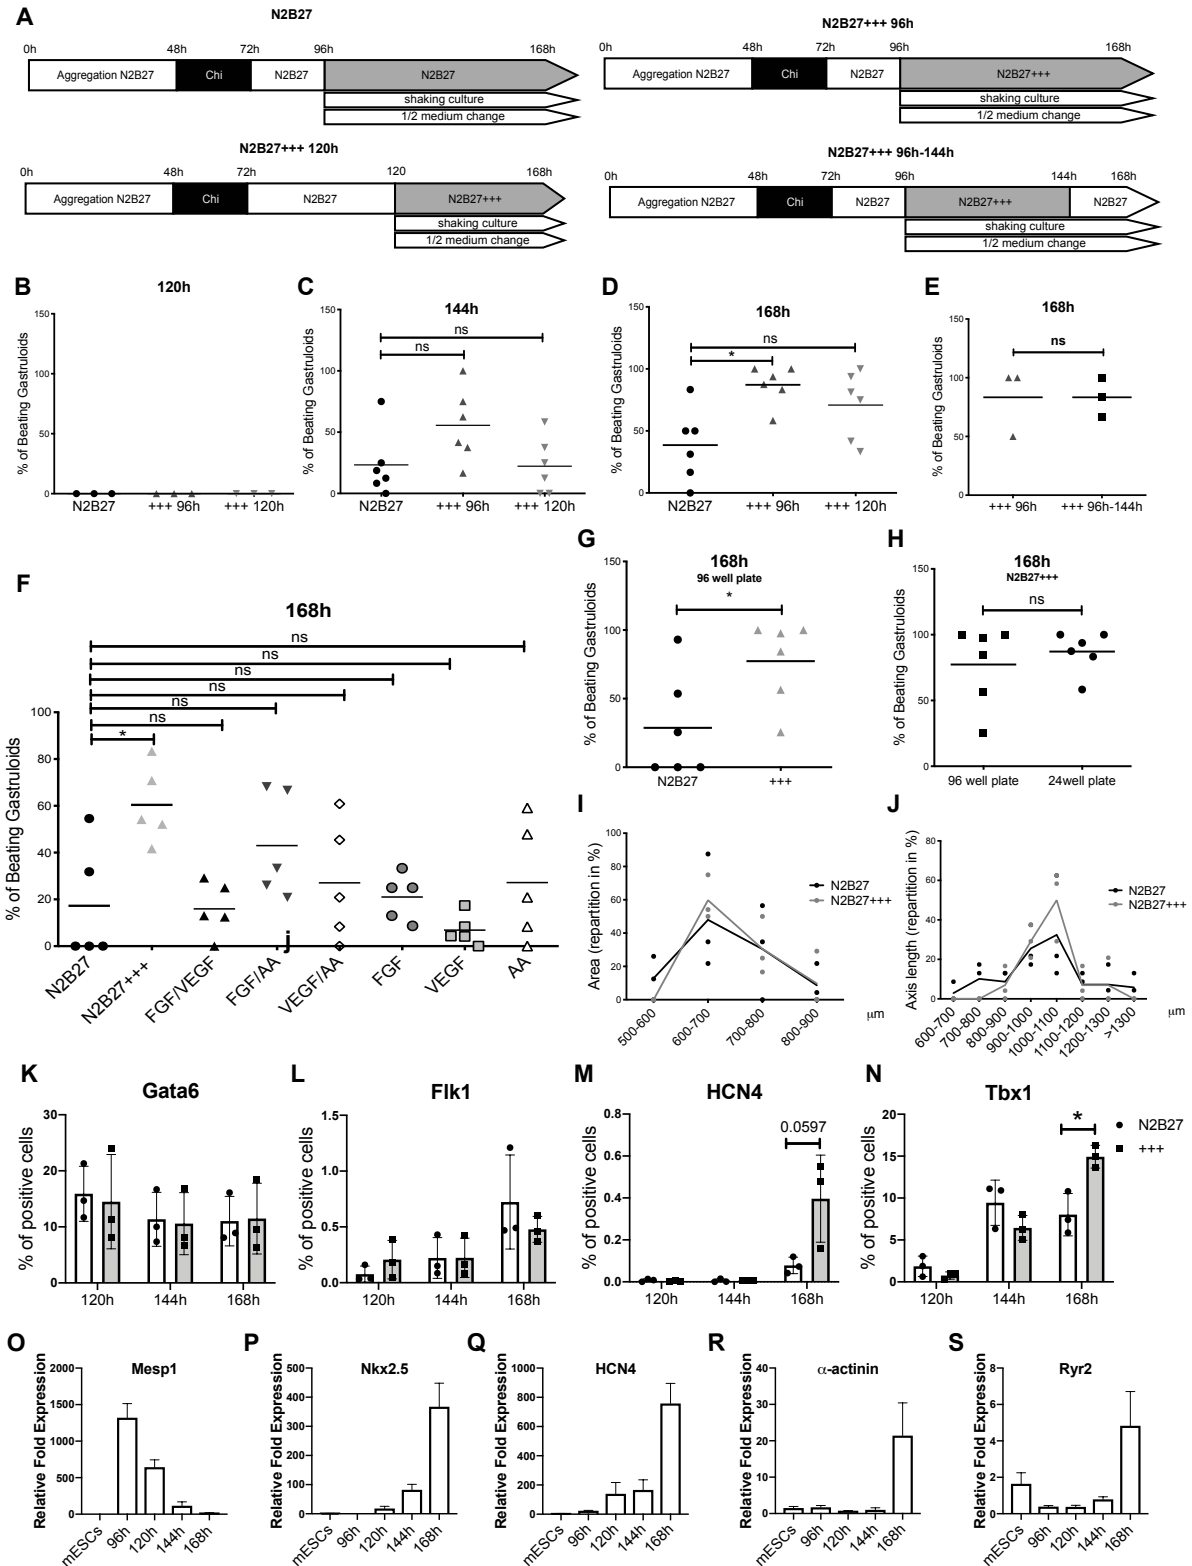

**Figure S1 | Comparison between N2B27 and N2B27+++ culture conditions. Related to Fig. 1. A,** Schematics of the different culture conditions tested. **B-E,** Percentage of beating gastruloids from 120 to 168h in the different conditions. **F,** Exposure to N2B27+++ induces beating at higher frequencies compared to exposure to single factors or couples. **G, H,** Frequencies of beating gastruloids grown in 96well plates (**G**) and comparison with those grown in 24 well plates from 144h (**H**). Each dot in **B-H** represents an independent experiment. **I-J,** Quantification of area and axis of gastruloids at 168h grown in N2B27 or N2B27+++ . Mean of  $n=3$  independent experiments. **K-N,** FACS analysis graphs showing the percentages of reporter positive

cells in N2B27 or N2B27+++ at different time points.  $n=3$  independent experiments. **O-S**, qPCR gene expression profiles of cardiac genes in gastruloids from 96 to 168 h. Data are expressed as relative fold expression compared to mESCs in  $n = 4$  independent experiments. Data are represented as individual data points or mean  $\pm$  SD.

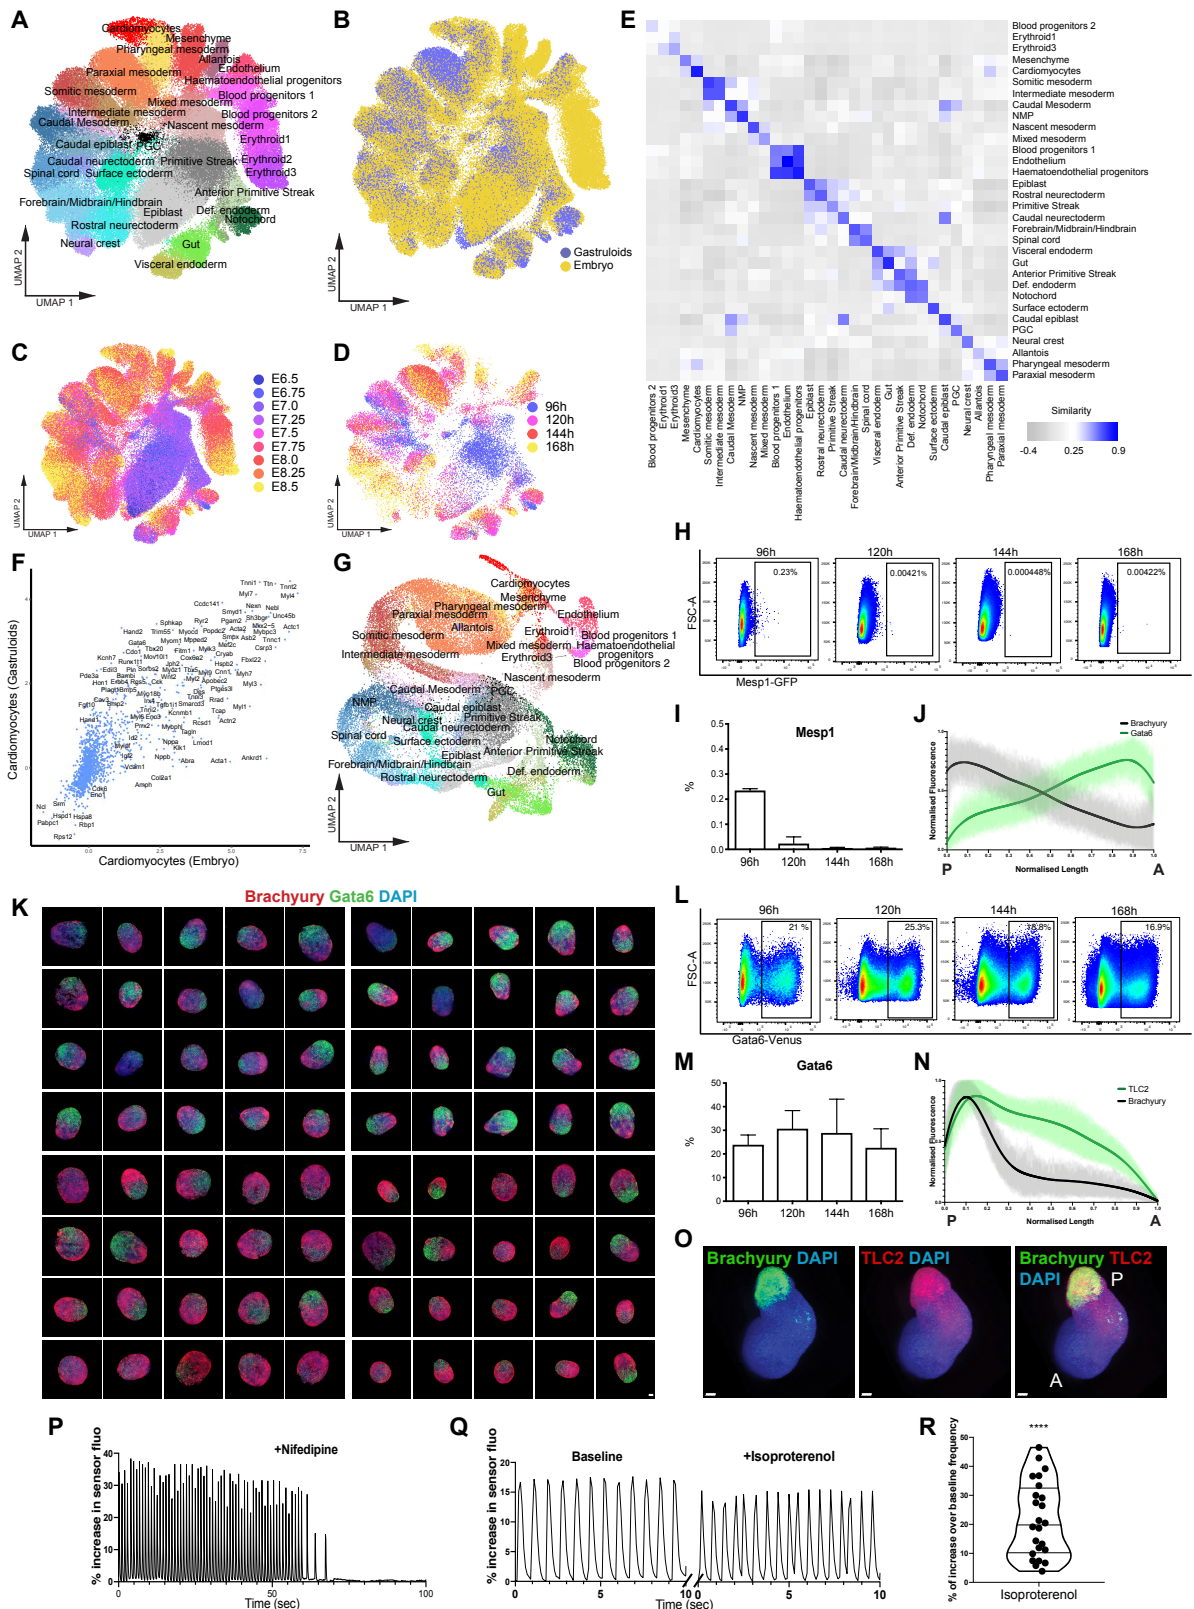

**Figure S2 | Development of cardiovascular progenitors in gastruloids. Related to Fig. 1 and Fig. 2.** A, B, UMAP plots showing the alignment of embryonic and gastruloid cells. The *in vivo* cell identities as annotated by (Pijuan-Sala et al., 2019) were transferred to their analogs in gastruloids based on the alignment (A) and the relative distribution of gastruloid and embryo cells within the UMAP is shown in (B). C, D, Correspondence between embryonic stages (C) and gastruloid time points (D) based on the aligned view. E, Calcium imaging traces showing the response of gastruloid cells to nifedipine (P) and isoproterenol (Q). R, Violin plot showing the distribution of % increase over baseline frequency for isoproterenol treatment.



Heat map showing the similarity by cell type between embryo and gastruloid cells in **A** (cosine similarity based on the scaled expression of all variable genes). **F**, Scatterplot showing the scaled variable gene expression in gastruloids vs. embryo cardiomyocytes. **G**, Transferred annotations from (Pijuan-Sala et al., 2019) shown on the UMAP projection of **Fig. 1D**. **H, I**, FACS analysis of *Mesp1-GFP* gastruloids from 96 to 168h (**H**) and relative quantification (**I**).  $n=2$  independent experiments. **J, K**, Unbiased collection of gastruloids from 4 independent experiments showing *Gata6* and Brachyury signals along the A/P axis of gastruloids at 96h (**K**) and relative quantification (**J**).  $n=104$  gastruloids from 4 independent experiments. **L, M**, FACS analysis plots (**L**) and quantification (**M**) of *Gata6-Venus* gastruloids from 96 to 168.  $n=2$  independent experiments. **N, O**, Representative pictures of TLC2 gastruloids at 168h, showing expression of Brachyury and TLC2 (*TCF/LEF-mCherry*) (**O**) and relative quantification of the signals along the A/P axis (**N**).  $n=54$  gastruloids from 4 independent experiments. **P-R**, Treatment of 168 h gastruloids with Nifedipine ( $n=9$  gastruloids) (**P**) or Isoproterenol (**Q, R**) abolishes or fastens calcium spiking in the gastruloid cardiac portion, respectively. Graph in (**Q**) shows representative calcium spikes of gastruloids before and after Isoproterenol treatment, and graph in (**R**) the percentage of increase over baseline frequency of gastruloids after Isoproterenol treatment.  $n=24$  gastruloids. A: anterior; P: posterior. Scale bars, 100 $\mu$ m. Data are represented as individual data points or mean  $\pm$  SD.

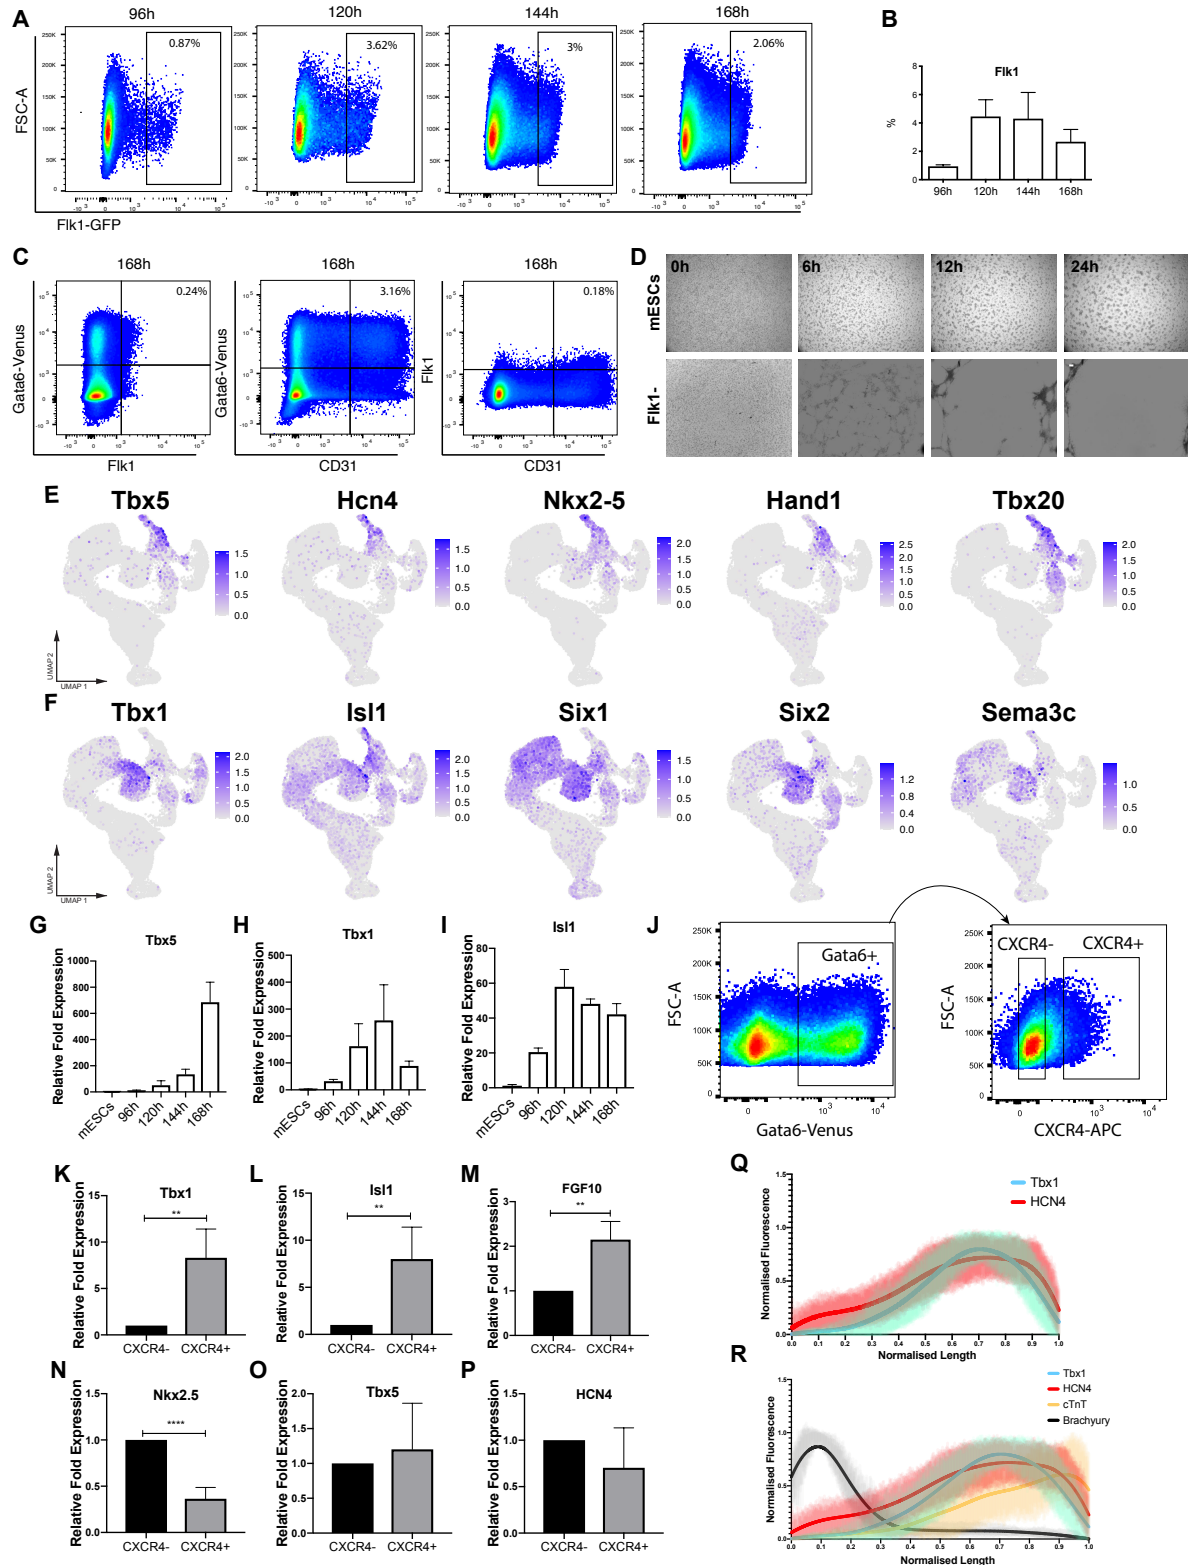

**Figure S3 | Characterization of cardiovascular progenitors. Related to Fig. 3 and Fig. 4.** A, B, FACS analysis of *Flik1-GFP* gastruloids from 96 to 168 (A) and relative quantification (B).  $n=2$  independent experiments. C, FACS analysis of *Gata6-Venus* gastruloids showing co-expression of *Flik1* and *CD31*.  $n=2$  independent experiments. D, Angiogenesis assay showing inability of undifferentiated mESCs and *Flik1*<sup>-</sup> cells to form vascular-like tubes. E, F, Expression of FHF (E) and SHF (F) marker genes. G-I, qPCR showing expression levels of markers of FHF (G) and SHF (H, I) in gastruloids from 96 to 168 h. Data are expressed as relative fold expression compared to mESCs in  $n = 4$  independent experiments. J, Representative plot

showing the gating strategy used to isolate SHF-enriched progenitors. **K-P**, Expression levels of markers of SHF (**K-M**) and FHF (**N-P**) in *Gata6*<sup>+</sup>/*CXCR*<sup>-</sup> and *Gata6*<sup>+</sup>/*CXCR*<sup>+</sup> cells isolated from gastruloids at 168 h. Data are expressed as relative fold expression compared to *Gata6*<sup>+</sup>/*CXCR*<sup>-</sup> cells in *n* = 4 independent experiments. **Q, R**, Quantification of *Tbx1*, *Hcn4*, cTnT and Brachyury signals along the A/P axis in gastruloids. *n*=42 gastruloids stained for *Tbx1*, *Hcn4* and cTnT and *n*=26 gastruloids stained for *Tbx1*, *Hcn4* and Brachyury. A: anterior; P: posterior. Scale bar, 100μm. Data are represented as mean ± SD.

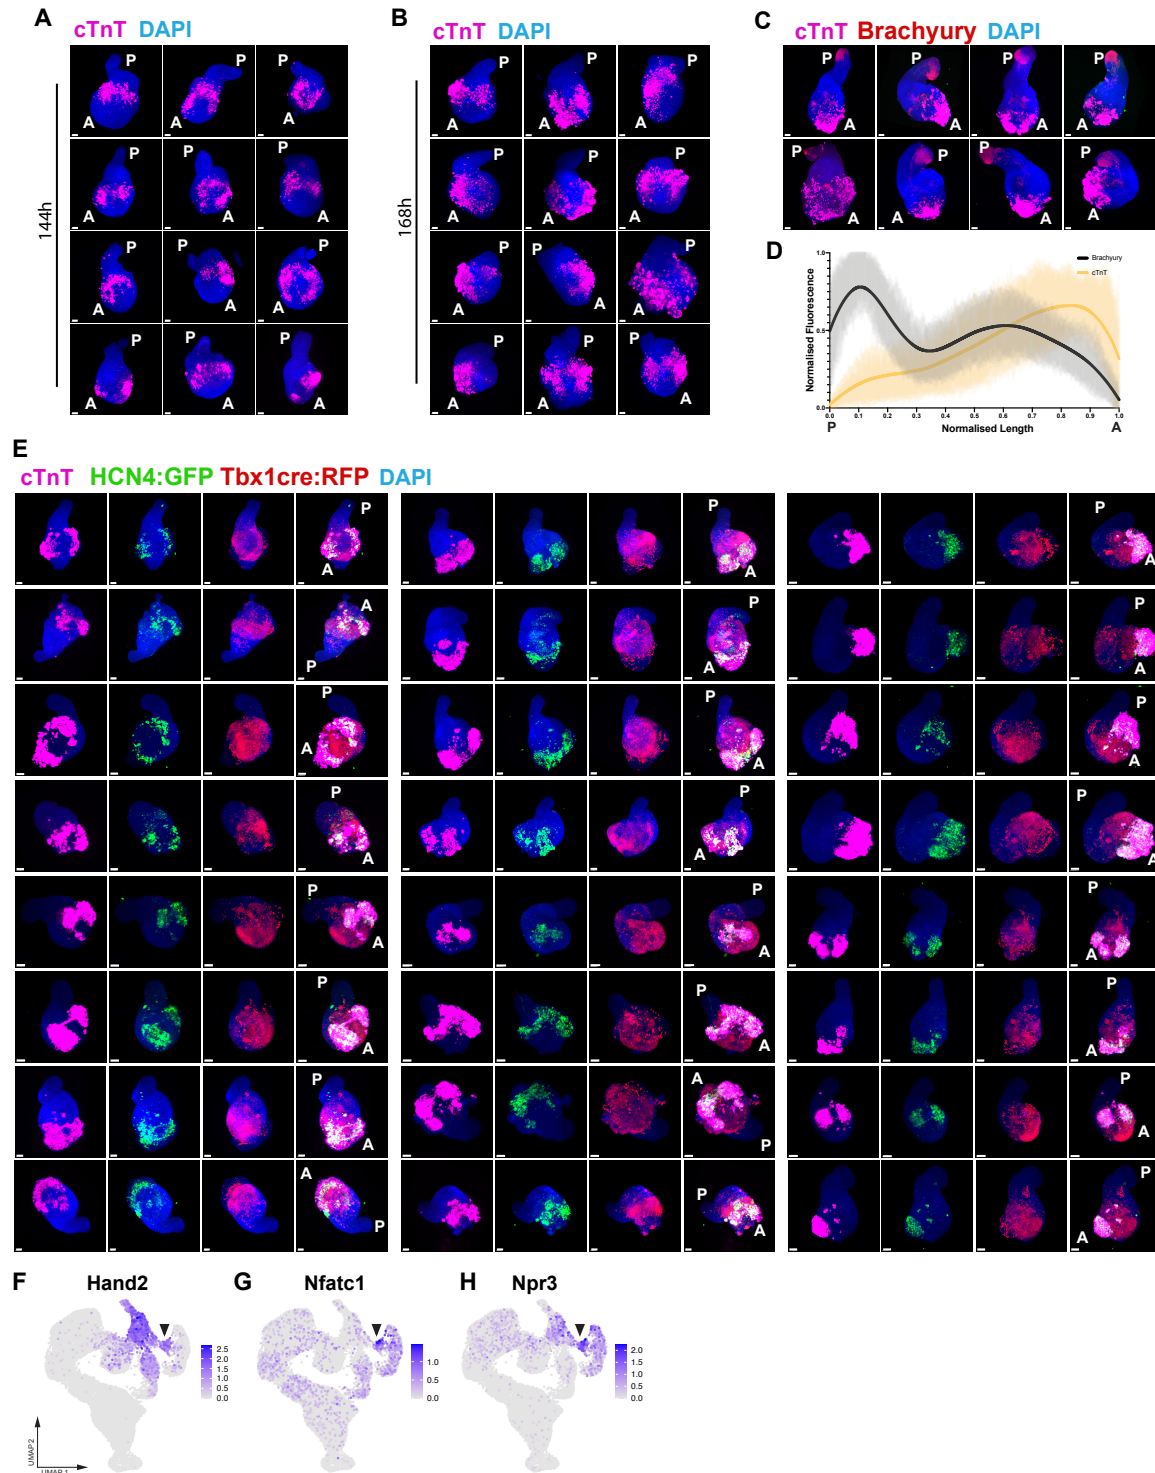

**Figure S4 | Characterization of the gastruloid cardiac portion. Related to Fig. 4 and Fig. 5.** A, B, Representative collection of *Sox1-GFP::Brachyury-mCherry* gastruloids at 144h (A) and 168h (B), showing expression of cTnT in the anterior domain.  $n=4$  independent experiments. C, D, Staining (C) and relative quantification (D) of cTnT and Brachyury signals along the A/P axis of gastruloids at 168h.  $n=38$  gastruloids from 2 independent experiments. E, Representative collection of *Hcn4-GFP::Tbx1Cre-RFP* gastruloids at 168h, showing the cardiac portion in the anterior domain.  $n=4$  independent experiments. F-H, Expression of endocardial genes. A: anterior; P: posterior. Scale bars, 100 $\mu$ m.
