# Supplementary material
Source: PubMed Central journal article supplement (PMC7867643)
Supplement: NIHMS1646312-supplement-1-s2_0-S1934590920305075-mmc8.pdf [file NIHMS1646312-supplement-1-s2_0-S1934590920305075-mmc8.pdf]

## Capturing Cardiogenesis in Gastruloids

## Graphical Abstract

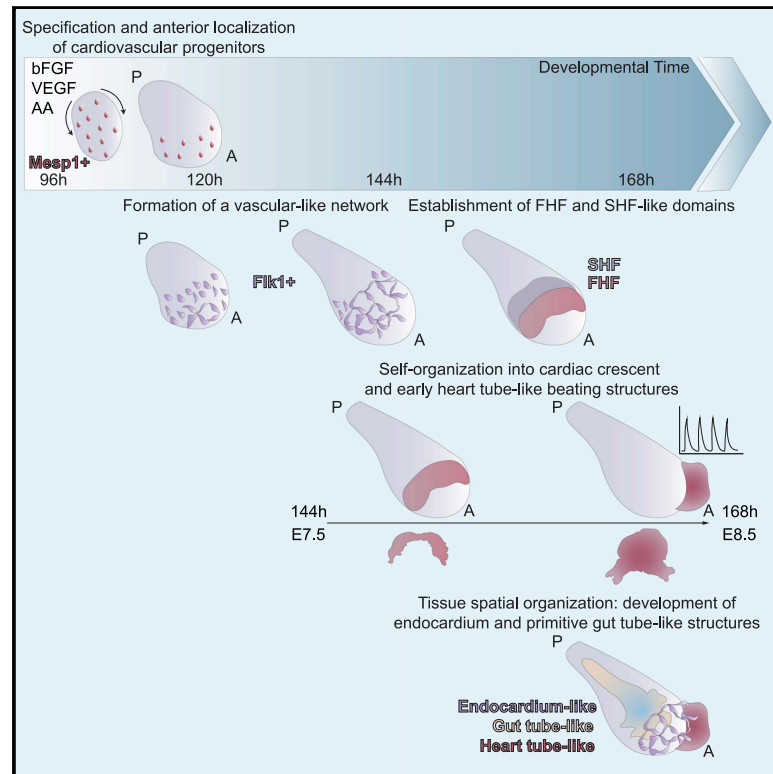

## Authors

Giuliana Rossi, Nicolas Broguiere, Matthew Miyamoto, ..., Robert G. Kelly, Chulan Kwon, Matthias P. Lutolf

## Correspondence

matthias.lutolf@epfl.ch

## In Brief

Rossi et al. describe an embryonic organoid model that mimics the early development of the heart, from the generation of cardiovascular precursor cells to the specification of the first and second heart fields. These axially patterned organoids support the formation of cardiac crescent and early cardiac tube-like structures while reproducing the cell diversity and tissue-tissue interactions typical of embryos.

## Highlights

- Gastruloids generate cardiovascular progenitors and form a vascular-like structure
- Both first and second heart field-like progenitors are specified
- Cardiac progenitors self-organize into crescent and heart tube-like beating domains
- Cellular diversity and tissue-tissue interactions mimic embryonic development

Article

# Capturing Cardiogenesis in Gastruloids

Giuliana Rossi,<sup>1</sup> Nicolas Broguiere,<sup>1</sup> Matthew Miyamoto,<sup>5,6,7</sup> Andrea Boni,<sup>2</sup> Romain Guiet,<sup>3</sup> Mehmet Girgin,<sup>1</sup> Robert G. Kelly,<sup>4</sup> Chulan Kwon,<sup>5,6,7</sup> and Matthias P. Lutolf<sup>1,8,9,\*</sup>

<sup>1</sup>Laboratory of Stem Cell Bioengineering, Institute of Bioengineering, School of Life Sciences and School of Engineering, École Polytechnique Fédérale de Lausanne (EPFL), Lausanne, 1015 Vaud, Switzerland

<sup>2</sup>Viventis Microscopy Sàrl, EPFL Innovation Park, Building C, Lausanne, 1015 Vaud, Switzerland

<sup>3</sup>Faculté des Sciences de la Vie, Bioimaging and Optics Platform, École Polytechnique Fédérale de Lausanne (EPFL), Bâtiment AI, Station 15, Lausanne, 1015 Vaud, Switzerland

<sup>4</sup>Aix-Marseille Université, CNRS UMR 7288, IBDM, Marseille, France

<sup>5</sup>Division of Cardiology, Department of Medicine, Johns Hopkins University School of Medicine, Baltimore, MD 21205, USA

<sup>6</sup>Institute for Cell Engineering, Johns Hopkins University School of Medicine, Baltimore, MD 21205, USA

<sup>7</sup>Cellular and Molecular Medicine, Johns Hopkins University School of Medicine, Baltimore, MD 21205, USA

<sup>8</sup>Institute of Chemical Sciences and Engineering, School of Basic Science, École Polytechnique Fédérale de Lausanne (EPFL), Lausanne, 1015 Vaud, Switzerland

<sup>9</sup>Lead Contact

\*Correspondence: [matthias.lutolf@epfl.ch](mailto:matthias.lutolf@epfl.ch)  
<https://doi.org/10.1016/j.stem.2020.10.013>

## SUMMARY

Organoids are powerful models for studying tissue development, physiology, and disease. However, current culture systems disrupt the inductive tissue-tissue interactions needed for the complex morphogenetic processes of native organogenesis. Here, we show that mouse embryonic stem cells (mESCs) can be coaxed to robustly undergo fundamental steps of early heart organogenesis with an *in-vivo*-like spatiotemporal fidelity. These axially patterned embryonic organoids (gastruloids) mimic embryonic development and support the generation of cardiovascular progenitors, including first and second heart fields. The cardiac progenitors self-organize into an anterior domain reminiscent of a cardiac crescent before forming a beating cardiac tissue near a putative primitive gut-like tube, from which it is separated by an endocardial-like layer. These findings unveil the surprising morphogenetic potential of mESCs to execute key aspects of organogenesis through the coordinated development of multiple tissues. This platform could be an excellent tool for studying heart development in unprecedented detail and throughput.

## INTRODUCTION

Stem-cell-derived organoids self-organize into complex structures that mimic aspects of the architecture, cellular composition, and function of tissues found in real organs (Clevers, 2016; Lancaster and Knoblich, 2014; Rossi et al., 2018; Sasai, 2013). Although most organoids simulate specific features of adult organs, embryonic organoids can capture key processes that occur during early embryonic development, from the pre-implantation blastocyst (Rivron et al., 2018) to early post-implantation development (Harrison et al., 2017; Shao et al., 2017a, 2017b; Sozen et al., 2018; Zheng et al., 2019) and gastrulation (Beccari et al., 2018; van den Brink et al., 2014). Although embryonic organoids have been shown to mimic many of the morphological and transcriptional hallmarks of the early embryo, their potential to undergo organogenesis has not yet been explored.

The heart is the first organ to form and function in the embryo. Short after gastrulation, heart progenitors are specified, progressively localize anteriorly, and organize in a crescent-shaped domain (by embryonic day 7.5 [E7.5]), the first cardiac compartment that is morphologically identifiable during development.

Cardiogenesis is based on the interaction of two different types of progenitors, namely the first heart field (FHF) and the second heart field (SHF) progenitors, the latter originating from pharyngeal mesoderm (Kelly et al., 2014). The cardiac crescent, mainly formed by FHF progenitors, subsequently rearranges to form a linear heart tube (around E8.0–E8.5), which is the first beating structure. Successively, SHF progenitors contribute to heart tube elongation and the heart undergoes looping, ballooning, and septation, giving rise to the four-chambered structure typical of adulthood (Harvey, 2002). Heart organogenesis requires cardiac progenitors to interact with surrounding tissues through mechanical interactions and the secretion of cardiac-inducing factors (Miquerol and Kelly, 2013). These involved tissues especially include the endothelium (Brutsaert, 2003; Brutsaert et al., 1998; Narmoneva et al., 2004) and foregut (Hosseini et al., 2017; Kidokoro et al., 2018; Lough and Sugi, 2000; Nascione and Mercola, 1995; Schultheiss et al., 1995; Varner and Taber, 2012).

We hypothesized that, due to their embryo-like multi-axial organization and gene expression patterns, mouse gastruloids (Beccari et al., 2018; van den Brink et al., 2014, 2020) could offer



a suitable template for modeling early heart development because they potentially preserve the crucial tissue-tissue interactions required for this organogenesis. Indeed, studying heart organogenesis in such a complex and spatially organized system could allow the modeling of developmental events in an embryo-like context, where cardiac cells are naturally exposed to the influence of other tissues.

Here, we show that self-organizing mouse embryonic stem cells (mESCs) can capture early heart organogenesis *in vitro* with a surprising temporal and spatial accuracy. Exposing small ESC aggregates to a cocktail of three cardiogenic factors in gastruloid culture conditions promotes cardiac development *in vitro* starting from *Mesp1*<sup>+</sup> progenitors, which progressively become restricted to the anterior portion of the gastruloid. Through a combination of light-sheet and confocal microscopy, RNAscope imaging, fluorescence-activated cell sorting (FACS), and single-cell RNA sequencing, we demonstrate that these embryoids support the formation of *Flk1*<sup>+</sup> cardiovascular progenitors, the generation of a vascular-like network, and the formation of progenitors with first and second heart field identities. Strikingly, we find evidence for the morphogenesis of an anterior cardiac crescent-like domain, which subsequently gives rise to a beating compartment exhibiting Ca<sup>2+</sup>-handling properties comparable to functional fetal cardiomyocytes. Morphogenesis is established in close spatial proximity to the most anterior portion of a co-developing gut-tube-like structure, which is separated from the cardiac domain by an endocardial-like layer. Therefore, this *in vitro* model of cardiac organogenesis uniquely captures interactions between embryonic tissues in the context of a spatially organized embryo-like entity.

## RESULTS

### Optimization of Culture Conditions to Promote Efficient Beating Portions in Gastruloids

Gastruloids occasionally formed a beating domain that is exclusively located within their anterior region (38.5% ± 29.3% formed at 168 h) when cultured for 144 h or longer in N2B27 medium (Figure 1A). The location and activity of this beating structure suggested that it might correspond to a cardiac primordium. We tested whether well-known cardiogenic factors (Rajala et al., 2011) could increase the frequency of this event by adding basic fibroblast growth factor, ascorbic acid, and vascular endothelial growth factor 165 (VEGF) (Kattman et al., 2006), singly or in combination, and we increased nutrient and growth factor availability through volume optimization and shaking (Figures 1A and S1A). In these culture conditions (termed N2B27+++), the frequency of beating gastruloids increased by more than a factor of two (87.2% ± 15.6% formed at 168 h; Figures 1A and 1B; Video S1). We noticed that exposure to cardiogenic factors was most effective when applied in combination and between 96 and 144 h (Figures S1A–S1H), so we kept this protocol for the following experiments. Importantly, culturing in N2B27+++ did not alter the polarization of the gastruloids, the extent of their elongation (Figures S1I and S1J), or the timing of the emergence of the beating domains (Figures 1A and S1B–S1D) compared to standard conditions. Staining for Gata4 and cardiac troponin T (cTnT) confirmed that the beating structure was cardiac like (Figure 1C). FACS analysis of reporter-cell-derived gastruloids at

different time points showed that gastruloids grown in N2B27 or N2B27+++ conditions were characterized by similar levels of cardiac progenitor markers (*Gata6* and *Flk1*; Figures S1K and S1L). However, at 168 h in N2B27+++ , there was an increase of expression of markers distinguishing the first and second heart fields (*Hcn4* and *Tbx1*; Figures S1M and S1N). This is in keeping with previous literature showing that the three cardiogenic factors can induce cardiac differentiation from pluripotent stem cells (Kattman et al., 2006) and, more specifically, late-stage cardiac myogenesis *in vitro* (Sugi and Lough, 1995; Takahashi et al., 2003; Ye et al., 2013).

To characterize our embryonic organoid system at the single-cell level, we performed single-cell RNA sequencing (scRNA-seq) analysis of gastruloids every 24 h from 96 h to 168 h. Unsupervised clustering identified 59 clusters, which were assigned to 32 cell types based on canonical markers (Table S1). Our analysis revealed the presence of a multitude of cell types (Figures 1D and 1E), in line with the embryo-like organization of gastruloids (Beccari et al., 2018). Trajectories estimated from RNA velocity (La Manno et al., 2018; Bergen et al., 2020) were in line with previously known lineage relationships (Figure 1F). Cells differentiated from an epiblast-like stage into three main branches, corresponding to the three germ layer derivatives (Figures 1D and 1F). Interestingly, some cross-talk between germ layers was also identified, such as the contribution of neuromesodermal progenitors (NMPs) to both mesodermal and neural lineages. We also detected cells with presomitic and somitic identity (van den Brink et al., 2020; Veenvliet et al., 2020), further confirming that gastruloids grown in N2B27+++ maintained the main features of those grown in N2B27. Overall, we observed a broader variety of differentiating cell types compared to a recently published scRNA-seq analysis of mouse gastruloids (van den Brink et al., 2020), likely due to the broader time range that we analyzed. Comparison of our results with a recently published scRNA-seq dataset of mouse gastrulation and early organogenesis (Pijuan-Sala et al., 2019) showed a striking degree of similarity (Figures S2A–S2G).

### The Formation of a Cardiac Domain Mimics *In Vivo* Heart Development

To understand whether the formation of the cardiac portion mimics developmentally relevant processes, we first analyzed the temporal expression of key genes involved in cardiovascular specification (Figures 1G–1K and S1O–S1S). Similar to what happens during embryonic development (Lescroart et al., 2014; Saga et al., 1996), the first upregulated cardiac gene was *Mesp1*, which was expressed around 96 h and then rapidly downregulated (Figures 1G, 2A, S1O, S2H, and S2I). Using a *Mesp1-GFP* reporter ESC line (Bondue et al., 2011) and live light-sheet imaging, we observed that *Mesp1* expression started in a mosaic-like manner at 96 h and then *Mesp1*-positive cells were first confined to the anterior side before slowly disappearing after 120 h (Figure 2B; Video S2). Concurrently with the elongation and formation of an anterior-posterior axis, *Gata6*-expressing cells, marking early cardiac differentiation, were localized to the anterior side in gastruloids generated from *Gata6-Venus* ESCs (Freyer et al., 2015), opposite to the pole that was positive for Brachyury (Figures 2C, S2J, and S2K). *Gata6* expression was maintained over time (Figures S2L and S2M).

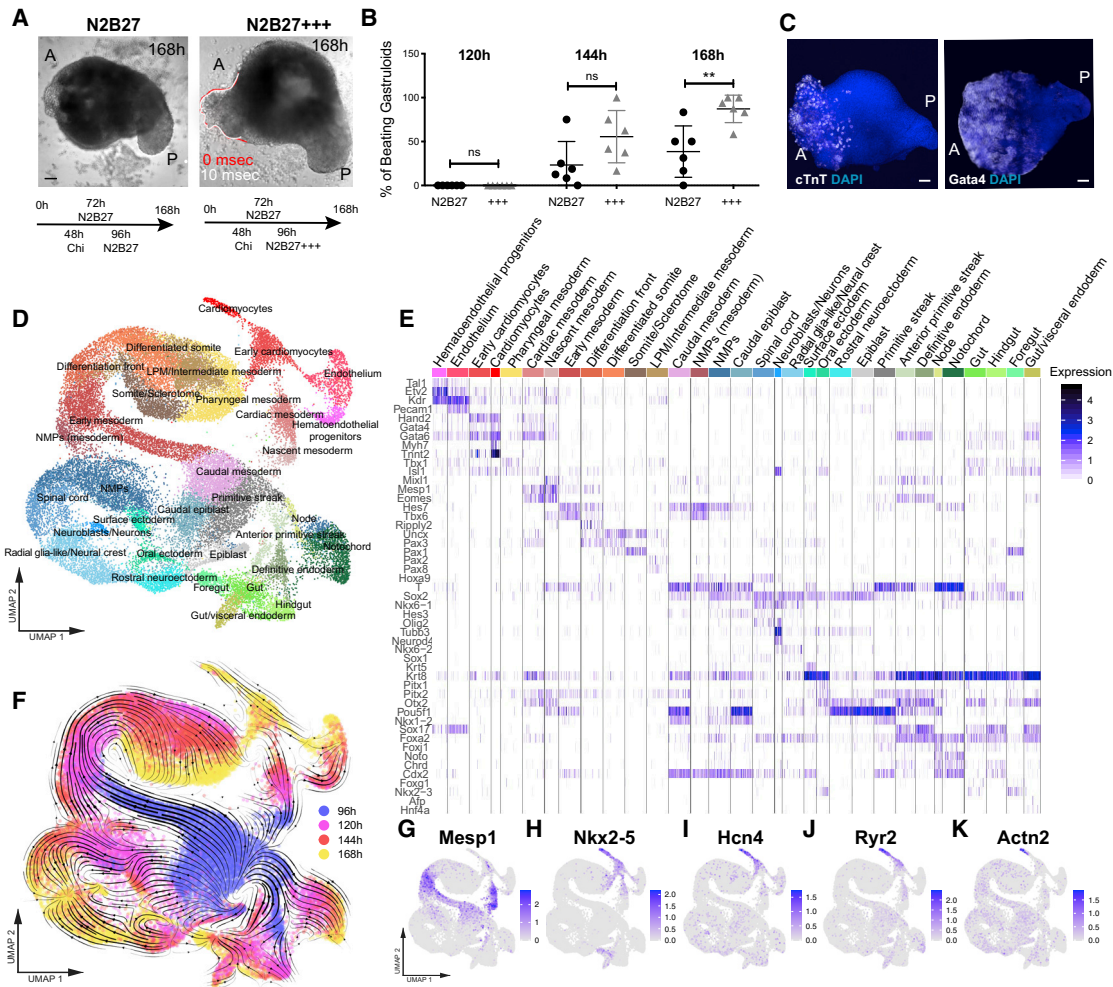

**Figure 1. Embryonic Organoids Recapitulate Heart Organogenesis**

(A) Gastruloids form a beating portion on their anterior side at 168 h. White and red lines highlight the displacement of the beating domain over 10 ms. (B) Frequency of beating structures at different time points in n = 6 independent experiments. (C) Immunofluorescence for Gata4 and cTnT on gastruloids at 168 h. (D) UMAP plot showing clusters obtained from 30,496 cells isolated from gastruloids at 96 h, 120 h, 144 h, and 168 h. n = 2 replicates per time point. (E) Heatmap showing the expression of canonical cell type markers illustrating the cell type diversity in (D). (F) Overlay of the time points analyzed (hours after aggregation) with the trajectories inferred from RNA velocity, projected on the uniform manifold approximation and projection (UMAP) in (D). (G–K) Expression of typical cardiac genes. Scale bars, 100 μm. A, anterior; P, posterior. See also [Figures S1](#) and [S2](#).

In the embryo, Wnt activity plays a key role in determining the fate and positioning of the developing cardiac cells ([Gessert and Kühl, 2010](#); [Naito et al., 2006](#)). To test the involvement of a similar regulatory axis *in vitro*, we generated gastruloids from a Wnt/β-catenin signaling activity reporter ESC line (*TCF/LEF-mCherry*; [Faunes et al., 2013](#); [Ferrer-Vaquero et al., 2010](#)). In line with published data ([Turner et al., 2017](#)), Wnt activity was found to be higher in the posterior region, coincident with the Brachyury-positive pole, and progressively decreased toward the anterior portion ([Figures S2N](#) and [S2O](#)), supporting a role for Wnt signaling in determining the positioning of the cardiac compartment along the anterior/posterior (A/P) axis.

From this stage onward, the early differentiation genes *Nkx2-5* and *Hcn4* were increasingly expressed ([Figures 1H](#), [1I](#), [S1P](#), and

[S1Q](#)), followed by genes marking mature cardiomyocytes (*α-ac-tinin/Actn2* and *Ryr2*; [Figures 1J](#), [1K](#), [S1R](#), and [S1S](#)). This sequence of gene expression shows that gastruloids, stimulated with cardiogenic factors, recapitulate the temporal and spatial gene expression dynamics of cardiac development from the specification of cardiac progenitors to the formation of a beating cardiac structure.

In cardiomyocytes, physical contraction is coupled to electrical excitation through intracellular changes of Ca<sup>2+</sup> ([Tyser et al., 2016](#)). To evaluate the functionality of the gastruloid cardiac domain, we thus assessed calcium transients, momentary spikes in voltage, by live gastruloid imaging via light-sheet microscopy (at 168 h). Image analysis revealed rhythmic calcium spiking in beating areas with a frequency comparable to beating

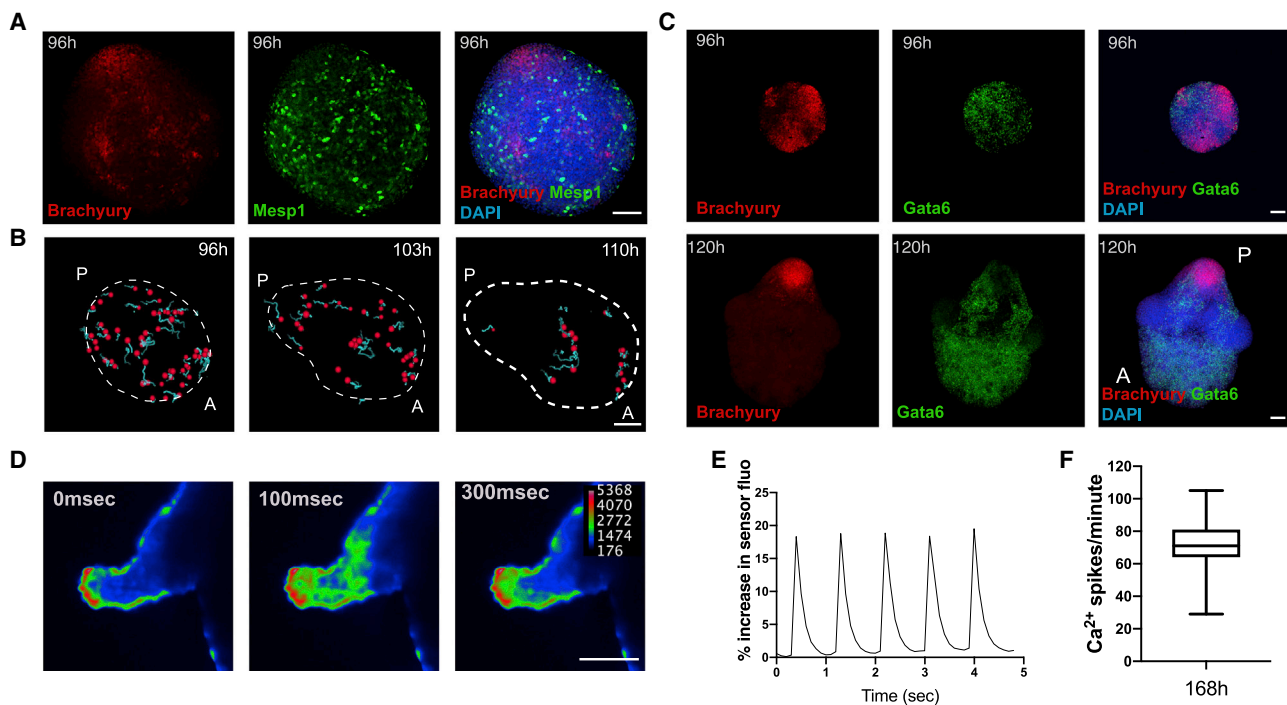

**Figure 2. Early Cardiac Development in Embryonic Organoids Mimics Embryonic Development**

(A) Spatial localization of *Mesp1*<sup>+</sup> cells (stained for GFP) at 96 h as compared to Brachyury expression.  
 (B) Tracking of *Mesp1*<sup>+</sup> cells with live light-sheet imaging from 96 to 110 h. Red, tracked cells; light blue, cell tracks forward.  
 (C) Spatial localization of *Gata6*<sup>+</sup> cells at 96 and 120 h compared to Brachyury expression.  
 (D) Calcium imaging of gastruloids at 168 h using a Cal-520 AM calcium dye and light-sheet microscopy.  
 (E) Representative spiking profile.  
 (F) Spiking frequency of the gastruloid cardiac portion at 168 h for n = 21 gastruloids.  
 Data are represented as mean ± whiskers from min to max. Scale bars, 100 μm. See also Figure S2.

rates observed in embryos from the crescent stage to the linear heart tube (Tyser et al., 2016; Figures 2D–2F; Video S3). Drugs interfering with calcium transport, including the l-type calcium channel blocker nifedipine and the β-adrenergic agonist isoproterenol, either completely inhibited these transients (Figure S2P) or caused an increase in spiking frequency (Figures S2Q and S2R), respectively. These data demonstrate that the cardiac compartments found in late gastruloids (168 h) exhibit Ca<sup>2+</sup>-handling properties compatible with functional cardiomyocytes.

#### Co-development of a Vascular Compartment within the Cardiac Domain

During embryonic development, the continuous cross-talk of endothelial cells with the developing heart is a prerequisite for cardiomyocyte maturation, function, and survival (Brutsaert, 2003). For this reason, we tested whether such tissue-tissue interactions could potentially take place in developing gastruloids, focusing on cardiovascular progenitors expressing the well-known marker *Flk1* (also known as *Kdr* or *Vegfr2*; Kattman et al., 2006). In 96-h gastruloids derived from a *Flk1*-GFP reporter ESC line (Jakobsson et al., 2010), *Flk1* was expressed at the anterior pole opposite to Brachyury (Figure 3A). Over time, *Flk1* expression persisted in the anterior portion of the gastruloids (Figures 3B, S3A, and S3B), and *Flk1*-positive cells started to form a vascular-like network of spindle-shaped cells (Figure 3C; Video S4) that stained positive

for the endothelial marker CD31 (Figures 3D and S3C). In an *in vitro* angiogenesis assay, *Flk1*-positive cells that were isolated by FACS from 168-h gastruloids and plated on Matrigel formed vascular-like networks similar to human umbilical vein endothelial cells (HUVECs) (Figures 3E and S3D). Interestingly, scRNA-seq analysis revealed the expression of typical endothelial markers (Figures 1E and 3F–3H) and suggested maturation of endothelial cells over time. Indeed, the upper portion of the endothelial cluster, corresponding to later stage (168 h) gastruloids (Figure 1F), expressed higher levels of genes associated with the Notch pathway (Figures 3I and 3J), which *in vivo* is involved in vascular morphogenesis, sprouting, and remodeling (Fischer et al., 2004; Krebs et al., 2000; Pitulescu et al., 2017). Moreover, endothelial cells at 168 h specifically expressed *Cav1* (Figure 3K), a gene responsible for caveolae formation and involved in endothelial cell maturation, migration, and tubule formation (Lamallice et al., 2007; Liu et al., 2002). Collectively, these results suggest that gastruloids comprise regions that develop into a vascular-like compartment, which is associated with undergoing cardiovascular development.

#### In Vitro Cardiac Development Entails First and Second Heart Field Development

A key feature of cardiogenesis is a coordinated interaction between two mesodermal progenitor populations: the FHF, which contributes to the left ventricle and part of the atria, and the



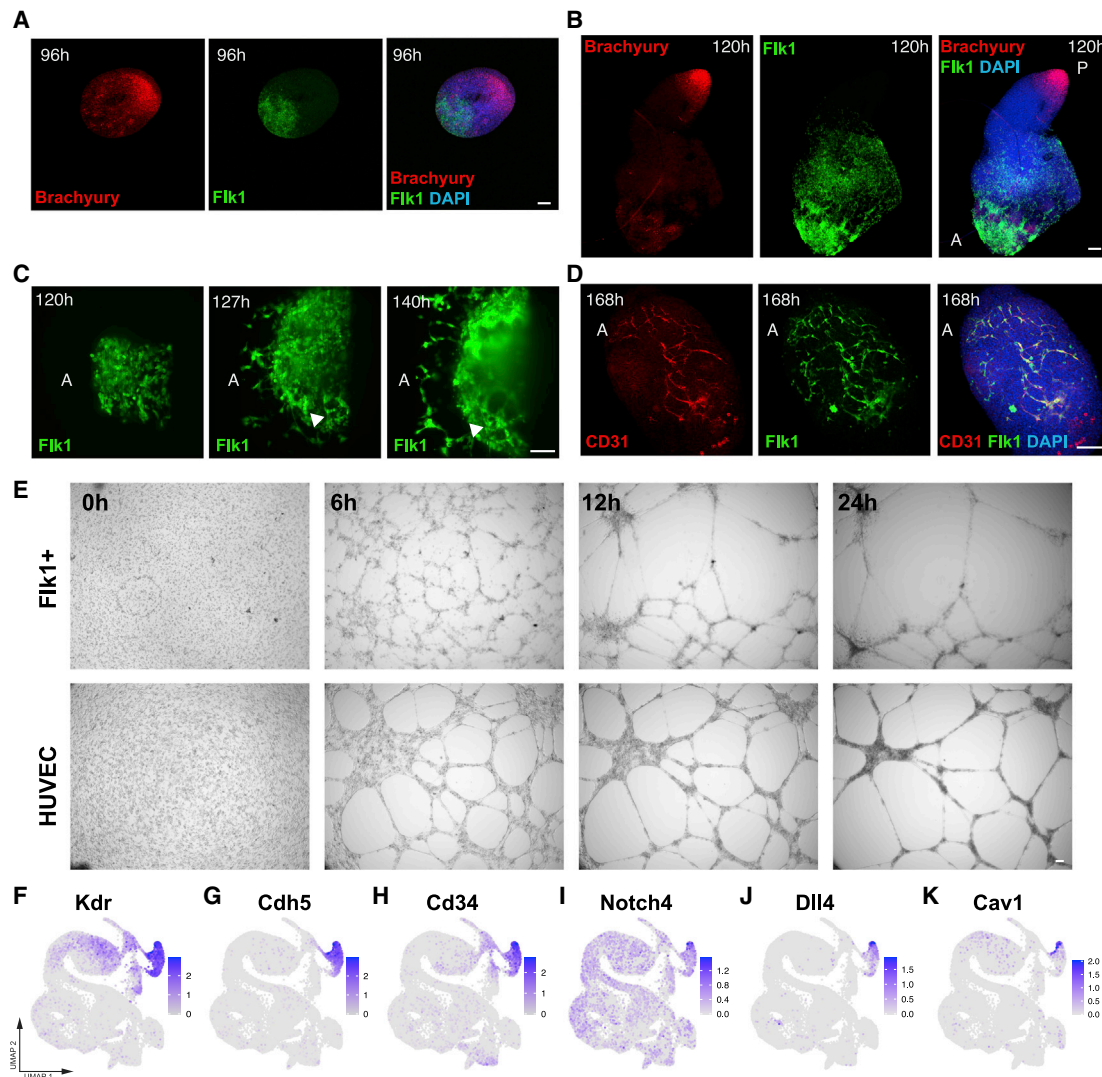

### Figure 3. Development of a Vascular-like Network

(A and B) Spatial localization of *Flk1*<sup>+</sup> cells at (A) 96 and (B) 120 h compared to Brachyury expression. Image in (B) is a composite of two separate images.

(C) Light-sheet live imaging of the anterior portion of *Flk1*-GFP gastruloids from 120 to 144 h, highlighting the formation of a vascular-like network.

(D) The *Flk1*<sup>+</sup> vascular-like network is positive for CD31.

(E) Angiogenesis assay showing tube formation in isolated *Flk1*<sup>+</sup> cells compared to HUVECs.

(F–K) UMAP plots showing the expression of endothelial marker genes (F–H) and genes related to endothelial cell maturation and morphogenesis (I–K) in the scRNA-seq dataset.

Scale bars, 100  $\mu$ m. See also Figure S3.

SHF, which gives rise to the outflow tract, right ventricle, and part of the atria (Harvey, 2002; Miquerol and Kelly, 2013). After migration from the posterior primitive streak, FHF progenitors form the cardiac crescent and early heart tube, located anteriorly. SHF progenitors, originating from cardiopharyngeal mesoderm (Cortes et al., 2018), are characterized by delayed differentiation and are located medially to the crescent, from where they contribute to heart-tube elongation. Both of these populations are characterized by a specific pattern of gene expression that was reproduced in embryonic organoids; focusing on FHF and SHF trajectories in our scRNA-seq dataset (Figure 4A), we observed that expression of typical FHF (Figures 4B and S3E)

and SHF (Figures 4B and S3F) markers (Bruneau et al., 1999; Buckingham et al., 2005; Guo et al., 2011; Liang et al., 2013; McFadden et al., 2005; de Soysa et al., 2019; Wang et al., 2019; Zhou et al., 2017) increased over time and labeled two different populations (Figures 4B and S3E–S3I).

FHF and SHF progenitors have previously been shown to derive from two successive peaks of *Mesp1* expression during development, which are associated with different transcriptional signatures (Lescroart et al., 2014, 2018). Strikingly, in gastruloids, we also observed an earlier (~96 h) and later (~120 h) window of *Mesp1* expression (Figures 4C and 4D) in two distinct trajectories that separate at early stages during gastrulation. Genes

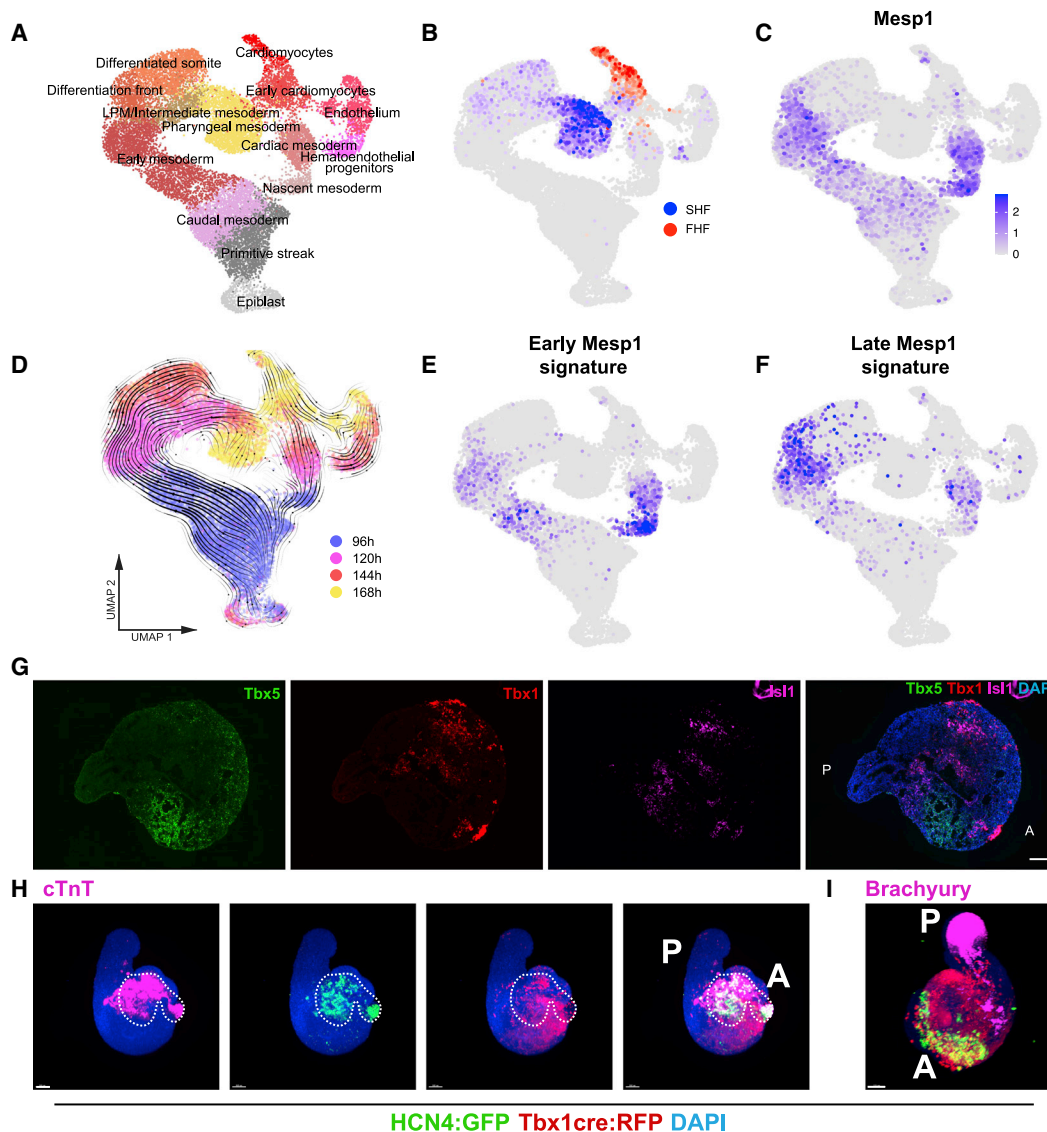

**Figure 4. Embryonic Organoids Form a First and Second Heart Field**

(A) UMAP plot showing clusters lying on the trajectories from epiblast to heart fields.  $n = 2$  replicates per time point.  
 (B) Localization of FHF on the UMAP in (A) based on expression of *Tbx5*, *Hcn4*, *Nkx2-5*, *Hand1*, and SHF based on the expression of *Tbx1*, *Six1*, and *Six2*.  
 (C) Expression of *Mesp1*.  
 (D) Overlay of time points and RNA velocity projected on the UMAP in (A).  
 (E and F) Gene signature scores for early (E) and late (F) *Mesp1*-expressing cells *in vivo* based on *in vivo* differentially expressed genes from [Lescroart et al. \(2014\)](#). The scores are only shown for *Mesp1*-positive cells.  
 (G) RNAscope showing spatial localization of FHF and SHF domains in gastruloids at 168 h. Images are stitched tile scans.  
 (H) Representative immunofluorescence pictures of *Hcn4-GFP::Tbx1Cre-RFP* gastruloids at 168 h, showing the presence of FHF and SHF progenitors in the anterior domain of gastruloids. The white dashed line highlights the position of the *Hcn4*-positive domain in all pictures.  $n = 48$  gastruloids from 4 independent experiments.  
 (I) Representative immunofluorescence picture of *Hcn4-GFP::Tbx1Cre-RFP* gastruloids at 168 h, showing Brachyury expression in the posterior region.  $n = 32$  gastruloids from 2 independent experiments.  
 Scale bars, 100  $\mu\text{m}$ . See also [Figures S3](#) and [S4](#).

expressed *in vivo* preferentially in the earlier *Mesp1*-positive precursors ([Lescroart et al., 2014](#)) were enriched by 96 h in gastruloid *Mesp1*-positive cells, although genes associated *in vivo* preferentially with the later *Mesp1*-positive precursors were enriched by 120 h in gastruloid *Mesp1*-positive cells ([Figures 4D–4F](#)). RNA velocity analysis ([Figure 4D](#)) suggested that progenitors expressing

FHF markers ([Figure 4B](#)) might be derived from *Mesp1*-expressing cells enriched for markers of the earlier population ([Figures 4B and 4E](#)), whereas progenitors expressing SHF markers ([Figure 4B](#)) might be derived from *Mesp1*-expressing cells enriched for markers of the later population ([Figures 4B and 4F](#)). Overall, these data show that gastruloids co-develop FHF- and SHF-like

progenitor cells, which are created by a temporal sequence that mimics embryonic development.

To corroborate the presence of progenitor cell populations from both heart fields in our cardiac organoids, we used three experimental paradigms. First, using a recently published protocol for FACS-isolating SHF progenitors based on the expression of the C-X-C chemokine receptor type 4 (CXCR4) (Figure S3J; Andersen et al., 2018), we observed that *Gata6*<sup>+</sup>/CXCR4<sup>+</sup> cells express higher levels of SHF markers (*Tbx1*, *Isl1*, and *Fgf10*) but low or unchanged levels of FHF markers (*Nkx2-5*, *Tbx5*, and *Hcn4*) compared to *Gata6*<sup>+</sup>/CXCR4<sup>-</sup> cells (Figures S3K–S3P). Second, RNAscope imaging showed the expression of FHF (*Tbx5*) and SHF (*Tbx1*) markers in mutually exclusive cell populations and *Isl1* mostly overlapping with *Tbx1* expression (Figure 4G). Third, gastruloids generated from a dual FHF/SHF reporter/tracer mESC line (*Hcn4:GFP*; *Tbx1-Cre:RFP*; Andersen et al., 2018) showed the development of a cardiac portion in their anterior domain (Figure 4H), with an *in vivo* like spatial arrangement: FHF progenitor cells localized more anteriorly with respect to SHF progenitors (Figure S3Q). All cardiac markers were expressed at the opposite pole to the posterior marker Brachyury (Figures 4I and S3R), and *Hcn4* signal was typically located in the beating portion of gastruloids at 168 h, where cTnT is expressed (Figures 4H and S3R). Together, these data show that late gastruloids contain key cell types that have the typical signature and spatial organization of first and second heart field progenitors.

### **In Vitro Cardiac Development Occurs through Establishment of a Crescent-like Structure**

After their specification in the mouse embryo, cardiac progenitors migrate antero-laterally and progressively fuse at the midline to define the first morphologically identifiable heart structure, the cardiac crescent, which appears around E7.5 (Miquerol and Kelly, 2013). Then, morphogenetic movements associated with foregut closure form a linear heart tube by E8.5 (Miquerol and Kelly, 2013). We explored whether gastruloids stimulated with cardiogenic factors could capture these morphological hallmarks of cardiogenesis. Remarkably, in gastruloids cultured for 144 h to 168 h, we observed a recapitulation of these events. Around 144 h, cTnT-positive cardiomyocytes were organized in crescent-like domains (Figures 5A and S4A). These further developed into denser crescent-like structures with beating areas, leading to beating epithelial protrusions on the anterior portion of the gastruloids at around 168 h (Figures 5A and S4B–S4E). Similar to mouse embryos (Ivanovitch et al., 2017; Le Garrec et al., 2017; Tyser et al., 2016), these phenotypes could be observed in gastruloids within 24 h and could be aligned to progressive morphological stages of embryonic cardiac development between E7.5 and E8.5. This is shown schematically in Figure 5B, which shows a comparison of the cardiac structures observed in gastruloids with a scheme of early stages of heart development in embryos. To provide a measure of the spectrum of shapes observed in gastruloids, we have generated artificial spherical, crescent-shaped, and concave shapes, which were used as a reference for a volumetric analysis, and we have measured geometric properties of both the artificial and observed shapes. The comparative volume analysis of the cTnT-positive gastruloid domains with the defined artificial shapes revealed a gradual transition from an almost spherical to a crescent-like shape (144–168 h) that then became

concave (168 h; Figure 5C). These results highlight the remarkable capacity of embryonic organoids to reproduce some key features typical of morphogenetic processes in the early stages of heart development.

### **In Vitro Cardiogenesis Happens in the Context of Physiological Tissue-Tissue Interactions**

The presence of a crescent-like structure and its evolution to a coherent beating group of cells led us to test whether this was accompanied by an association between the crescent and anterior endoderm, as is the case in the embryo (Ivanovitch et al., 2017; Lough and Sugi, 2000). Bulk transcriptomics analysis of late gastruloids revealed gene expression patterns (*Sox17*, *Shh*, and *Cdx2*) that suggested the presence of a primitive gut-tube-like tissue (Beccari et al., 2018) that was confirmed by our scRNA-seq analysis (Figures 1E and S2E). Strikingly, we found that the cTnT-positive cardiac domain in 168-h gastruloids was exclusively located next to a tube-shaped E-cadherin-positive epithelial tissue (n = 14/14), with a CD31-positive, putative endocardial-like layer in between (Figures 5D and 5E; Video S5). Moreover, we observed that, within the endothelial cluster in our scRNA-seq analysis (Figure 4A), the expression of genes previously associated with endocardium development (*Tbx5*, *Tbx20*, and *Hand2*; Figures S3E and S4F) and endocardium formation (*Nfatc1* and *Npr3*; Figures S4G and S4H; Feng et al., 2019; Zhang et al., 2016) was polarized in a subset of cells more closely associated with the early cardiomyocyte cluster (arrowheads), suggesting an endocardial identity. This is reminiscent of the spatial arrangement of anterior structures in the developing embryo (Ivanovitch et al., 2017).

## **DISCUSSION**

The heart develops through complex interactions between cardiac progenitors and surrounding tissues (Miquerol and Kelly, 2013). These interactions are crucial for sustaining cardiogenesis but have thus far not been reproduced *in vitro*. Indeed, even though numerous *in vitro* cardiac models, such as engineered heart muscles (Huebsch et al., 2016; Lind et al., 2017; Ma et al., 2015; Mills et al., 2019; Zhao et al., 2019) or cardiac spheroids (Giacomelli et al., 2017; Polonchuk et al., 2017), have been developed, the *in vitro* modeling of heart morphogenesis has been out of reach. Our results demonstrate that embryonic organoids can be stimulated to recapitulate *in vitro* the key steps of early cardiac development that *in vivo* require polarized interactions between different primordia. These interactions are critical for achieving the architectural and compositional complexity that are absent in conventional organoids (Rossi et al., 2018) but appear to be provided by the multi-axial properties and spatial organization of the different embryonic tissues that are characteristic of gastruloids (Beccari et al., 2018).

We show that embryonic organoids can be stimulated to form a cardiac portion that involves key developmental hallmarks, such as the generation and spatial arrangement of early cardiac progenitors and first and second heart field compartmentalization. Of note, precardiac spheroids were previously shown to generate progenitors with FHF and SHF identity; however, these spheroids did not develop an organized structure (Andersen et al., 2018). In contrast, in our model system, these populations emerged in an



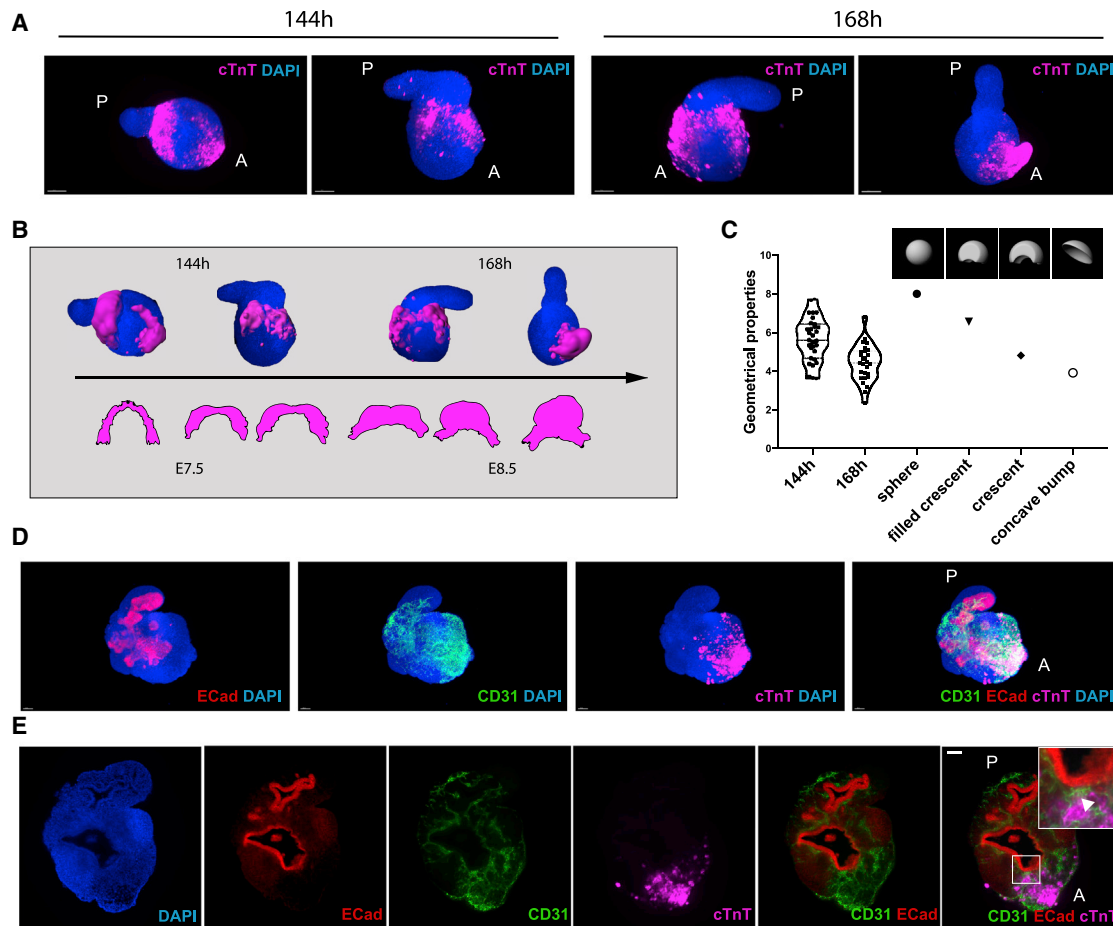

**Figure 5. Embryonic Organoids Recapitulate Cardiac Morphogenesis**

(A) Light-sheet imaging of cleared gastruloids from 144 to 168 h show an initial crescent-like domain that is condensed into a beating bud at 168 h. (B) Schematic illustrating the comparison between gastruloid stages of cardiac development and embryonic stages from cardiac crescent to linear heart tube. (C) Quantification of geometrical properties (sphericity) of the gastruloid cardiac domains compared to those of defined artificial shapes, with  $n = 31$  gastruloids at 144 h and  $n = 27$  gastruloids at 168 h. (D and E) The cardiac domain is localized near the anterior epithelial gut-tube-like structure, separated by a  $CD31^+$  endocardial layer. Scale bars, 100  $\mu\text{m}$ . See also [Figure S4](#).

embryo-like, spatially organized structure. Moreover, the cardiac portion in our system co-developed with a vascular network and an endodermal component, both known to influence cardiac development (Brutsaert, 2003; Lough and Sugi, 2000). Due to the importance of these neighboring developing tissues, previous attempts were performed to derive spheroids composed of both endothelial and cardiac cells (Giacomelli et al., 2017; Polonchuk et al., 2017). However, these systems, based on an aggregation of cells pre-differentiated in 2D, lacked any visible structural organization. Future work will explore whether the morphogenetic processes seen in our system require the presence of spatial complexity (e.g., multi-axial embryonic patterning) and cross-talk with other tissues. In particular, the use of drugs or conditional knockout models to selectively inhibit the development of endoderm or endothelial compartments, as well as models based on diphtheria toxins to remove them in later stages, will be very useful to gain a mechanistic insight into the morphogenetic processes described here. These experiments would not only contribute to a better characterization of the embryonic organoid model pre-

sented here but would also be extremely useful to study *in vitro* how the influences of surrounding tissues are fine-tuned during heart development. Indeed, we believe that the unique cardiac morphogenetic behavior described in this system, which happens in the context of multi-axial 3D structures mimicking embryonic body plan development (Beccari et al., 2018), together with the concerted development of the other embryonic tissues, provides a useful tool for the study of long-standing developmental biology questions with unprecedented resolution and throughput.

Collectively, our data show that embryonic organoids have the potential for modeling organogenesis. Herein, we have steered the self-organization of small aggregates of mESCs to form a cardiac primordium as a precursor of an embryonic heart. In the future, it will be interesting to study whether cardiac primordia can be further developed and matured and what type of tissue-tissue interactions are functionally involved in their development. Additionally, the principles presented here should be applicable to other organ systems once it is possible to overcome the significant challenge of the limited lifespan of embryonic organoids.

### Limitations of Study

This study describes the emergence of multiple tissues in an embryonic organoid model. Although we observed a similar phenotype using different cell lines, it has been previously shown that distinct cell lines might show a different propensity to differentiate into specific cell types. Specifically, it has been suggested that the genetic background might skew the cell-type composition of gastruloids (van den Brink et al., 2020) and mESC differentiation in general (Ortmann et al., 2020). Such cell-line-associated heterogeneity has been observed also for human gastrulation *in vitro* models (Tewary et al., 2019). Moreover, regardless of the genetic background, mESC culture conditions can also impact their differentiation propensity (Ghimire et al., 2018). Similarly, we observed that different cell lines vary in their response to the Wnt agonist CHIR99021. All these factors should be taken into account when deriving gastruloids from a new cell line. Future studies could help to better decipher the mechanisms underlying these differences.

### STAR★METHODS

Detailed methods are provided in the online version of this paper and include the following:

- KEY RESOURCES TABLE
- RESOURCE AVAILABILITY
  - Lead Contact
  - Materials Availability
  - Data and Code Availability
- EXPERIMENTAL MODEL AND SUBJECT DETAILS
  - Cell Lines
- METHOD DETAILS
  - Gastruloid culture
  - Live imaging and cell tracking
  - Immunofluorescence, confocal and light-sheet imaging on fixed samples
  - RNA extraction and qRT-PCR
  - Single cell RNA-seq
  - RNAscope
  - Flow cytometry analysis and FACS
  - *In vitro* angiogenesis assay
  - Calcium imaging
  - Crescent analysis
- QUANTIFICATION AND STATISTICAL ANALYSIS
  - Quantification of immunofluorescence signals along the A/P axis
  - Statistics

### SUPPLEMENTAL INFORMATION

Supplemental Information can be found online at <https://doi.org/10.1016/j.stem.2020.10.013>.

### ACKNOWLEDGMENTS

We thank Alfonso Martinez Arias for great support throughout the project. We thank Denis Duboule and Nadia Mercader for useful feedback on the manuscript. We thank Gioele La Manno for helpful discussion on single-cell RNA-seq. We thank members of the Lutolf laboratory for discussions and sharing materials, Cédric Blanpain (ULB) for providing *Mesp1-GFP* cells, Alexander Medvinsky (MRC Edinburgh) for providing *Fik1-GFP* cells, Andrew Oates

(EPFL) and Peter Strnad (Viventis Microscopy Sàrl) for making light-sheet LS1 Live microscope available and for technical support, Olivier Burri for EasyXT development, Thierry Laroche for support with Z1 light-sheet imaging, Arne Seitz and other members of Bioimaging and Optics Facility (EPFL) for microscopy support, Jessica Sordet-Dessimoz and Gian-Filippo Mancini from Histology Core Facility for RNAscope, and all personnel of Histology Core Facility, Flow Cytometry Core Facility, and Gene Expression Core Facility (EPFL) for their technical support. This work was funded by EPFL.

### AUTHOR CONTRIBUTIONS

G.R. and M.P.L. conceived the study, designed experiments, analyzed data, and wrote the manuscript. G.R. performed the experiments, N.B. performed scRNA-seq data analysis, M.M. contributed to experiments with the *Hcn4-GFP::Tbx1Cre-RFP* mESC line, A.B. performed *in vivo* light-sheet imaging of *Mesp1-GFP* and *Fik1-GFP* gastruloids, R.G. developed the script for the analysis of cardiac structures, M.G. contributed to protocol optimization and data analysis, and C.K. and R.G.K. contributed to study design and data discussion and provided feedback on the manuscript.

### DECLARATION OF INTERESTS

A.B. is part of Viventis Microscopy Sàrl that has commercialized the LS1 light-sheet microscope used in this study for time-lapse imaging of gastruloids. The EPFL (with Cambridge Enterprise Limited) has filed for patent protection (PCT/GB2019/052668) on the embryoid technology described herein, and M.P.L. and G.R. are named as inventors on the patent.

Received: October 17, 2019

Revised: August 21, 2020

Accepted: October 19, 2020

Published: November 10, 2020

### REFERENCES

- Andersen, P., Tampakakis, E., Jimenez, D.V., Kannan, S., Miyamoto, M., Shin, H.K., Saberi, A., Murphy, S., Sulistio, E., Chelko, S.P., and Kwon, C. (2018). Precardiac organoids form two heart fields via Bmp/Wnt signaling. *Nat. Commun.* 9, 3140.
- Baillie-Johnson, P., van den Brink, S.C., Balayo, T., Turner, D.A., and Martinez Arias, A. (2015). Generation of aggregates of mouse embryonic stem cells that show symmetry breaking, polarization and emergent collective behaviour *in vitro*. *J. Vis. Exp.* 53252.
- Beccari, L., Moris, N., Girgin, M., Turner, D.A., Baillie-Johnson, P., Cossy, A.-C., Lutolf, M.P., Duboule, D., and Arias, A.M. (2018). Multi-axial self-organization properties of mouse embryonic stem cells into gastruloids. *Nature* 562, 272–276.
- Bergen, V., Lange, M., Peidli, S., Wolf, F.A., and Theis, F.J. (2020). Generalizing RNA velocity to transient cell states through dynamical modeling. *Nat. Biotechnol.* Published online August 3, 2020. <https://doi.org/10.1038/s41587-020-0591-3>.
- Bondue, A., Tännler, S., Chiapparo, G., Chabab, S., Ramialison, M., Paulissen, C., Beck, B., Harvey, R., and Blanpain, C. (2011). Defining the earliest step of cardiovascular progenitor specification during embryonic stem cell differentiation. *J. Cell Biol.* 192, 751–765.
- Bruneau, B.G., Logan, M., Davis, N., Levi, T., Tabin, C.J., Seidman, J.G., and Seidman, C.E. (1999). Chamber-specific cardiac expression of Tbx5 and heart defects in Holt-Oram syndrome. *Dev. Biol.* 211, 100–108.
- Brutsaert, D.L. (2003). Cardiac endothelial-myocardial signaling: its role in cardiac growth, contractile performance, and rhythmicity. *Physiol. Rev.* 83, 59–115.
- Brutsaert, D.L., Fransen, P., Andries, L.J., De Keulenaer, G.W., and Sys, S.U. (1998). Cardiac endothelium and myocardial function. *Cardiovasc. Res.* 38, 281–290.
- Buckingham, M., Meilhac, S., and Zaffran, S. (2005). Building the mammalian heart from two sources of myocardial cells. *Nat. Rev. Genet.* 6, 826–835.

- Clevers, H. (2016). Modeling development and disease with organoids. *Cell* **165**, 1586–1597.
- Cortes, C., Francou, A., De Bono, C., and Kelly, R.G. (2018). Epithelial properties of the second heart field. *Circ. Res.* **122**, 142–154.
- de Soysa, T.Y., Ranade, S.S., Okawa, S., Ravichandran, S., Huang, Y., Salunga, H.T., Schrick, A., Del Sol, A., Gifford, C.A., and Srivastava, D. (2019). Single-cell analysis of cardiogenesis reveals basis for organ-level developmental defects. *Nature* **572**, 120–124.
- Deluz, C., Friman, E.T., Strebing, D., Benke, A., Raccaud, M., Callegari, A., Leleu, M., Manley, S., and Suter, D.M. (2016). A role for mitotic bookmarking of SOX2 in pluripotency and differentiation. *Genes Dev.* **30**, 2538–2550.
- Faunes, F., Hayward, P., Descalzo, S.M., Chatterjee, S.S., Balayo, T., Trott, J., Christoforou, A., Ferrer-Vaquer, A., Hadjantonakis, A.-K., Dasgupta, R., and Arias, A.M. (2013). A membrane-associated  $\beta$ -catenin/Oct4 complex correlates with ground-state pluripotency in mouse embryonic stem cells. *Development* **140**, 1171–1183.
- Feng, W., Chen, L., Nguyen, P.K., Wu, S.M., and Li, G. (2019). Single cell analysis of endothelial cells identified organ-specific molecular signatures and heart-specific cell populations and molecular features. *Front. Cardiovasc. Med.* **6**, 165.
- Ferrer-Vaquer, A., Piliszek, A., Tian, G., Aho, R.J., Dufort, D., and Hadjantonakis, A.-K. (2010). A sensitive and bright single-cell resolution live imaging reporter of Wnt/ $\beta$ -catenin signaling in the mouse. *BMC Dev. Biol.* **10**, 121.
- Fischer, A., Schumacher, N., Maier, M., Sendtner, M., and Gessler, M. (2004). The Notch target genes *Hey1* and *Hey2* are required for embryonic vascular development. *Genes Dev.* **18**, 901–911.
- Freyer, L., Schröter, C., Saiz, N., Schrode, N., Nowotschin, S., Martinez-Arias, A., and Hadjantonakis, A.-K. (2015). A loss-of-function and H2B-Venus transcriptional reporter allele for *Gata6* in mice. *BMC Dev. Biol.* **15**, 38.
- Gessert, S., and Kühl, M. (2010). The multiple phases and faces of wnt signaling during cardiac differentiation and development. *Circ. Res.* **107**, 186–199.
- Ghimire, S., Van der Jeught, M., Neupane, J., Roost, M.S., Anckaert, J., Popovic, M., Van Nieuwerburgh, F., Mestdag, P., Vandesompele, J., Deforce, D., et al. (2018). Comparative analysis of naive, primed and ground state pluripotency in mouse embryonic stem cells originating from the same genetic background. *Sci. Rep.* **8**, 5884.
- Giacomelli, E., Bellin, M., Sala, L., van Meer, B.J., Tertoolen, L.G.J., Orlova, V.V., and Mummery, C.L. (2017). Three-dimensional cardiac microtissues composed of cardiomyocytes and endothelial cells co-differentiated from human pluripotent stem cells. *Development* **144**, 1008–1017.
- Guo, C., Sun, Y., Zhou, B., Adam, R.M., Li, X., Pu, W.T., Morrow, B.E., Moon, A., and Li, X. (2011). A *Tbx1-Six1/Eya1-Fgf8* genetic pathway controls mammalian cardiovascular and craniofacial morphogenesis. *J. Clin. Invest.* **121**, 1585–1595.
- Harrison, S.E., Sozen, B., Christodoulou, N., Kyprianou, C., and Zernicka-Goetz, M. (2017). Assembly of embryonic and extraembryonic stem cells to mimic embryogenesis in vitro. *Science* **356**, eaal1810.
- Harvey, R.P. (2002). Patterning the vertebrate heart. *Nat. Rev. Genet.* **3**, 544–556.
- Hosseini, H.S., Garcia, K.E., and Taber, L.A. (2017). A new hypothesis for foregut and heart tube formation based on differential growth and actomyosin contraction. *Development* **144**, 2381–2391.
- Huebsch, N., Loskill, P., Deveshwar, N., Spencer, C.I., Judge, L.M., Mandegar, M.A., Fox, C.B., Mohamed, T.M.A., Ma, Z., Mathur, A., et al. (2016). Miniaturized iPSC-cell-derived cardiac muscles for physiologically relevant drug response analyses. *Sci. Rep.* **6**, 24726.
- Ivanovitch, K., Temiño, S., and Torres, M. (2017). Live imaging of heart tube development in mouse reveals alternating phases of cardiac differentiation and morphogenesis. *eLife* **6**, e30668.
- Jakobsson, L., Franco, C.A., Bentley, K., Collins, R.T., Ponsioen, B., Aspalter, I.M., Rosewell, I., Busse, M., Thurston, G., Medvinsky, A., et al. (2010). Endothelial cells dynamically compete for the tip cell position during angiogenic sprouting. *Nat. Cell Biol.* **12**, 943–953.
- Kattman, S.J., Huber, T.L., and Keller, G.M. (2006). Multipotent *flk-1+* cardiovascular progenitor cells give rise to the cardiomyocyte, endothelial, and vascular smooth muscle lineages. *Dev. Cell* **11**, 723–732.
- Kelly, R.G., Buckingham, M.E., and Moorman, A.F. (2014). Heart fields and cardiac morphogenesis. *Cold Spring Harb. Perspect. Med.* **4**, a015750.
- Kidokoro, H., Yonei-Tamura, S., Tamura, K., Schoenwolf, G.C., and Saijoh, Y. (2018). The heart tube forms and elongates through dynamic cell rearrangement coordinated with foregut extension. *Development* **145**, dev152488.
- Kiselev, V.Y., Yiu, A., and Hemberg, M. (2018). scmap: projection of single-cell RNA-seq data across data sets. *Nat. Methods* **15**, 359–362.
- Korsunsky, I., Millard, N., Fan, J., Slowikowski, K., Zhang, F., Wei, K., Baglaenko, Y., Brenner, M., Loh, P.R., and Raychaudhuri, S. (2019). Fast, sensitive and accurate integration of single-cell data with Harmony. *Nat. Methods* **16**, 1289–1296.
- Krebs, L.T., Xue, Y., Norton, C.R., Shutter, J.R., Maguire, M., Sundberg, J.P., Gallahan, D., Closson, V., Kitajewski, J., Callahan, R., et al. (2000). Notch signaling is essential for vascular morphogenesis in mice. *Genes Dev.* **14**, 1343–1352.
- La Manno, G., Soldatov, R., Zeisel, A., Braun, E., Hochgerner, H., Petukhov, V., Lidschreiber, K., Kastrioti, M.E., Lönnerberg, P., Furlan, A., et al. (2018). RNA velocity of single cells. *Nature* **560**, 494–498.
- Lamallice, L., Le Boeuf, F., and Huot, J. (2007). Endothelial cell migration during angiogenesis. *Circ. Res.* **100**, 782–794.
- Lancaster, M.A., and Knoblich, J.A. (2014). Organogenesis in a dish: modeling development and disease using organoid technologies. *Science* **345**, 1247125.
- Le Garrec, J.-F., Dominguez, J.N., Desgrange, A., Ivanovitch, K.D., Raphaël, E., Bangham, J.A., Torres, M., Coen, E., Mohun, T.J., and Meilhac, S.M. (2017). A predictive model of asymmetric morphogenesis from 3D reconstructions of mouse heart looping dynamics. *eLife* **6**, e28951.
- Lee, E., Choi, J., Jo, Y., Kim, J.Y., Jang, Y.J., Lee, H.M., Kim, S.Y., Lee, H.-J., Cho, K., Jung, N., et al. (2016). ACT-PRESTO: Rapid and consistent tissue clearing and labeling method for 3-dimensional (3D) imaging. *Sci. Rep.* **6**, 18631.
- Lescroart, F., Chabab, S., Lin, X., Rulands, S., Paulissen, C., Rodolosse, A., Auer, H., Achouri, Y., Dubois, C., Bondue, A., et al. (2014). Early lineage restriction in temporally distinct populations of *Mesp1* progenitors during mammalian heart development. *Nat. Cell Biol.* **16**, 829–840.
- Lescroart, F., Wang, X., Lin, X., Swedlund, B., Gargouri, S., Sánchez-Dânes, A., Moignard, V., Dubois, C., Paulissen, C., Kinston, S., et al. (2018). Defining the earliest step of cardiovascular lineage segregation by single-cell RNA-seq. *Science* **359**, 1177–1181.
- Liang, X., Wang, G., Lin, L., Lowe, J., Zhang, Q., Bu, L., Chen, Y., Chen, J., Sun, Y., and Evans, S.M. (2013). HCN4 dynamically marks the first heart field and conduction system precursors. *Circ. Res.* **113**, 399–407.
- Lind, J.U., Busbee, T.A., Valentine, A.D., Pasqualini, F.S., Yuan, H., Yadid, M., Park, S.-J., Kotikian, A., Nesmith, A.P., Campbell, P.H., et al. (2017). Instrumented cardiac microphysiological devices via multimaterial three-dimensional printing. *Nat. Mater.* **16**, 303–308.
- Liu, J., Wang, X.B., Park, D.S., and Lisanti, M.P. (2002). Caveolin-1 expression enhances endothelial capillary tubule formation. *J. Biol. Chem.* **277**, 10661–10668.
- Lough, J., and Sugi, Y. (2000). Endoderm and heart development. *Dev. Dyn.* **217**, 327–342.
- Ma, Z., Wang, J., Loskill, P., Huebsch, N., Koo, S., Svedlund, F.L., Marks, N.C., Hua, E.W., Grigoropoulos, C.P., Conklin, B.R., and Healy, K.E. (2015). Self-organizing human cardiac microchambers mediated by geometric confinement. *Nat. Commun.* **6**, 7413.
- McFadden, D.G., Barbosa, A.C., Richardson, J.A., Schneider, M.D., Srivastava, D., and Olson, E.N. (2005). The *Hand1* and *Hand2* transcription factors regulate expansion of the embryonic cardiac ventricles in a gene dosage-dependent manner. *Development* **132**, 189–201.

- McGinnis, C.S., Murrow, L.M., and Gartner, Z.J. (2019). DoubletFinder: doublet detection in single-cell RNA sequencing data using artificial nearest neighbors. *Cell Syst.* **8**, 329–337.e4.
- Mills, R.J., Parker, B.L., Quaipe-Ryan, G.A., Voges, H.K., Needham, E.J., Bornot, A., Ding, M., Andersson, H., Polla, M., Elliott, D.A., et al. (2019). Drug screening in human PSC-cardiac organoids identifies pro-proliferative compounds acting via the mevalonate pathway. *Cell Stem Cell* **24**, 895–907.e6.
- Miquerol, L., and Kelly, R.G. (2013). Organogenesis of the vertebrate heart. *Wiley Interdiscip. Rev. Dev. Biol.* **2**, 17–29.
- Naito, A.T., Shiojima, I., Akazawa, H., Hidaka, K., Morisaki, T., Kikuchi, A., and Komuro, I. (2006). Developmental stage-specific biphasic roles of Wnt/ $\beta$ -catenin signaling in cardiomyogenesis and hematopoiesis. *Proc. Natl. Acad. Sci. USA* **103**, 19812–19817.
- Narmonova, D.A., Vukmirovic, R., Davis, M.E., Kamm, R.D., and Lee, R.T. (2004). Endothelial cells promote cardiac myocyte survival and spatial reorganization: implications for cardiac regeneration. *Circulation* **110**, 962–968.
- Nascone, N., and Mercola, M. (1995). An inductive role for the endoderm in *Xenopus* cardiogenesis. *Development* **121**, 515–523.
- Ortmann, D., Brown, S., Czechanski, A., Aydin, S., Muraro, D., Huang, Y., Tomaz, R.A., Osnato, A., Canu, G., Wesley, B.T., et al. (2020). Naive pluripotent stem cells exhibit phenotypic variability that is driven by genetic variation. *Cell Stem Cell* **27**, 470–481.e6.
- Pietzsch, T., Saalfeld, S., Preibisch, S., and Tomancak, P. (2015). BigDataViewer: visualization and processing for large image data sets. *Nat. Methods* **12**, 481–483.
- Pijuan-Sala, B., Griffiths, J.A., Guibentif, C., Hiscock, T.W., Jawaid, W., Calero-Nieto, F.J., Mulas, C., Ibarra-Soria, X., Tyser, R.C.V., Ho, D.L.L., et al. (2019). A single-cell molecular map of mouse gastrulation and early organogenesis. *Nature* **566**, 490–495.
- Pitulescu, M.E., Schmidt, I., Giaimo, B.D., Antoine, T., Berkenfeld, F., Ferrante, F., Park, H., Ehling, M., Biljes, D., Rocha, S.F., et al. (2017). Dll4 and Notch signalling couples sprouting angiogenesis and artery formation. *Nat. Cell Biol.* **19**, 915–927.
- Polonchuk, L., Chabria, M., Badi, L., Hoflack, J.-C., Figtree, G., Davies, M.J., and Gentile, C. (2017). Cardiac spheroids as promising in vitro models to study the human heart microenvironment. *Sci. Rep.* **7**, 7005.
- Rajala, K., Pekkanen-Mattila, M., and Aalto-Setälä, K. (2011). Cardiac differentiation of pluripotent stem cells. *Stem Cells Int.* **2011**, 383709.
- Rivron, N.C., Frias-Aldeguer, J., Vrij, E.J., Boisset, J.-C., Korving, J., Vivie, J., Truckenmüller, R.K., van Oudenaarden, A., van Blitterswijk, C.A., and Geijsen, N. (2018). Blastocyst-like structures generated solely from stem cells. *Nature* **557**, 106–111.
- Rossi, G., Manfrin, A., and Lutolf, M.P. (2018). Progress and potential in organoid research. *Nat. Rev. Genet.* **19**, 671–687.
- Saga, Y., Hata, N., Kobayashi, S., Magnuson, T., Seldin, M.F., and Taketo, M.M. (1996). *MesP1*: a novel basic helix-loop-helix protein expressed in the nascent mesodermal cells during mouse gastrulation. *Development* **122**, 2769–2778.
- Sasai, Y. (2013). Cytosystems dynamics in self-organization of tissue architecture. *Nature* **493**, 318–326.
- Schindelin, J., Arganda-Carreras, I., Frise, E., Kaynig, V., Longair, M., Pietzsch, T., Preibisch, S., Rueden, C., Saalfeld, S., Schmid, B., et al. (2012). Fiji: an open-source platform for biological-image analysis. *Nat. Methods* **9**, 676–682.
- Schultheiss, T.M., Xydas, S., and Lassar, A.B. (1995). Induction of avian cardiac myogenesis by anterior endoderm. *Development* **121**, 4203–4214.
- Shao, Y., Taniguchi, K., Townshend, R.F., Miki, T., Gumucio, D.L., and Fu, J. (2017a). A pluripotent stem cell-based model for post-implantation human amniotic sac development. *Nat. Commun.* **8**, 208.
- Shao, Y., Taniguchi, K., Gurdziel, K., Townshend, R.F., Xue, X., Yong, K.M.A., Sang, J., Spence, J.R., Gumucio, D.L., and Fu, J. (2017b). Self-organized amniogenesis by human pluripotent stem cells in a biomimetic implantation-like niche. *Nat. Mater.* **16**, 419–425.
- Sozen, B., Amadei, G., Cox, A., Wang, R., Na, E., Czukiewska, S., Chappell, L., Voet, T., Michel, G., Jing, N., et al. (2018). Self-assembly of embryonic and two extra-embryonic stem cell types into gastrulating embryo-like structures. *Nat. Cell Biol.* **20**, 979–989.
- Stuart, T., Butler, A., Hoffman, P., Hafemeister, C., Papalexi, E., Mauck, W.M., 3rd, Hao, Y., Stoerckius, M., Smibert, P., and Satija, R. (2019). Comprehensive integration of single-cell data. *Cell* **177**, 1888–1902.e21.
- Sugi, Y., and Lough, J. (1995). Activin-A and FGF-2 mimic the inductive effects of anterior endoderm on terminal cardiac myogenesis in vitro. *Dev. Biol.* **168**, 567–574.
- Takahashi, T., Lord, B., Schulze, P.C., Fryer, R.M., Sarang, S.S., Gullans, S.R., and Lee, R.T. (2003). Ascorbic acid enhances differentiation of embryonic stem cells into cardiac myocytes. *Circulation* **107**, 1912–1916.
- Tewary, M., Dziedzicka, D., Ostblom, J., Prochazka, L., Shakiba, N., Heydari, T., Aguilar-Hidalgo, D., Woodford, C., Piccinini, E., Becerra-Alonso, D., et al. (2019). High-throughput micropatterning platform reveals Nodal-dependent fate of peri-gastrulation-associated versus preneurulation-associated fate patterning. *PLoS Biol.* **17**, e3000081.
- Turner, D.A., Girgin, M., Alonso-Crisostomo, L., Trivedi, V., Baillie-Johnson, P., Glodowski, C.R., Hayward, P.C., Collignon, J., Gustavsen, C., Serup, P., et al. (2017). Anteroposterior polarity and elongation in the absence of extra-embryonic tissues and of spatially localised signalling in gastruloids: mammalian embryonic organoids. *Development* **144**, 3894–3906.
- Tyser, R.C., Miranda, A.M., Chen, C.-M., Davidson, S.M., Srinivas, S., and Riley, P.R. (2016). Calcium handling precedes cardiac differentiation to initiate the first heartbeat. *eLife* **5**, e17113.
- van den Brink, S.C., Baillie-Johnson, P., Balayo, T., Hadjantonakis, A.-K., Nowotschin, S., Turner, D.A., and Martinez Arias, A. (2014). Symmetry breaking, germ layer specification and axial organisation in aggregates of mouse embryonic stem cells. *Development* **141**, 4231–4242.
- van den Brink, S.C., Alemany, A., van Batenburg, V., Moris, N., Blotenburg, M., Vivie, J., Baillie-Johnson, P., Nichols, J., Sonnen, K.F., Martinez Arias, A., and van Oudenaarden, A. (2020). Single-cell and spatial transcriptomics reveal somitogenesis in gastruloids. *Nature* **582**, 405–409.
- Varner, V.D., and Taber, L.A. (2012). Not just inductive: a crucial mechanical role for the endoderm during heart tube assembly. *Development* **139**, 1680–1690.
- Veenvliet, J.V., Bolondi, A., Kretzmer, H., Haut, L., Scholze-Wittler, M., Schifferl, D., Koch, F., Pustet, M., Heimann, S., Buschow, R., et al. (2020). Mouse embryonic stem cells self-organize into trunk-like structures with neural tube and somites. *bioRxiv*. <https://doi.org/10.1101/2020.03.04.974949>.
- Wang, W., Niu, X., Stuart, T., Julian, E., Mauck, W.M., 3rd, Kelly, R.G., Satija, R., and Christiaen, L. (2019). A single-cell transcriptional roadmap for cardiopharyngeal fate diversification. *Nat. Cell Biol.* **21**, 674–686.
- Wolf, F.A., Angerer, P., and Theis, F.J. (2018). SCANPY: large-scale single-cell gene expression data analysis. *Genome Biol.* **19**, 15.
- Ye, L., Zhang, S., Greder, L., Dutton, J., Keirstead, S.A., Lepley, M., Zhang, L., Kaufman, D., and Zhang, J. (2013). Effective cardiac myocyte differentiation of human induced pluripotent stem cells requires VEGF. *PLoS ONE* **8**, e53764.
- Zhang, H., Pu, W., Li, G., Huang, X., He, L., Tian, X., Liu, Q., Zhang, L., Wu, S.M., Sucov, H.M., and Zhou, B. (2016). Endocardium minimally contributes to coronary endothelium in the embryonic ventricular free walls. *Circ. Res.* **118**, 1880–1893.
- Zhao, Y., Rafatani, N., Feric, N.T., Cox, B.J., Aschar-Sobbi, R., Wang, E.Y., Aggarwal, P., Zhang, B., Conant, G., Ronaldson-Bouchard, K., et al. (2019). A platform for generation of chamber-specific cardiac tissues and disease modeling. *Cell* **176**, 913–927.e18.
- Zheng, Y., Xue, X., Shao, Y., Wang, S., Esfahani, S.N., Li, Z., Muncie, J.M., Lakin, J.N., Weaver, V.M., Gumucio, D.L., and Fu, J. (2019). Controlled modelling of human epiblast and amnion development using stem cells. *Nature* **573**, 421–425.
- Zhou, Z., Wang, J., Guo, C., Chang, W., Zhuang, J., Zhu, P., and Li, X. (2017). Temporally distinct Six2-positive second heart field progenitors regulate mammalian heart development and disease. *Cell Rep.* **18**, 1019–1032.



STAR★METHODS

KEY RESOURCES TABLE

| REAGENT or RESOURCE                                                                                              | SOURCE                                  | IDENTIFIER                                                                                                                          |
|------------------------------------------------------------------------------------------------------------------|-----------------------------------------|-------------------------------------------------------------------------------------------------------------------------------------|
| <b>Antibodies</b>                                                                                                |                                         |                                                                                                                                     |
| Mouse monoclonal anti-Gata4 (clone G-4)                                                                          | Santa Cruz Biotechnology                | Cat # sc-25310; RRID: AB_627667                                                                                                     |
| Chicken polyclonal anti-GFP                                                                                      | Aves labs                               | Cat # GFP-1020; RRID: AB_2307313                                                                                                    |
| Goat polyclonal anti-Brachyury (C-19)                                                                            | Santa Cruz Biotechnology                | Cat # sc-17745; RRID:AB_2200243                                                                                                     |
| Rabbit monoclonal anti-Brachyury (clone EPR18113)                                                                | Abcam                                   | Cat # ab209665; RRID: AB_2750925                                                                                                    |
| Rat monoclonal anti-CD31 (clone MEC 13.3)                                                                        | BD                                      | Cat # 553370; RRID:AB_394816                                                                                                        |
| Mouse monoclonal anti-cardiac troponin (clone 13-11)                                                             | ThermoFisher                            | Cat # MA5-12960; RRID:AB_11000742                                                                                                   |
| Rabbit monoclonal anti-E-Cadherin (24E10)                                                                        | Cell Signaling Technology               | Cat # 3195; RRID:AB_2291471                                                                                                         |
| PE rat monoclonal anti-CD31 (clone MEC 13.3)                                                                     | BD                                      | Cat # 561073; RRID:AB_10563931                                                                                                      |
| APC rat monoclonal anti-VEGFR2/Fik1 (clone Avas12)                                                               | Biolegend                               | Cat # 136405; RRID:AB_2044066                                                                                                       |
| APC rat monoclonal anti-CXCR4 (clone 2B11)                                                                       | BD                                      | Cat # 558644; RRID:AB_1645219                                                                                                       |
| RNAscope Probe-Mm-Tbx1                                                                                           | ACD bio                                 | Cat # 481911                                                                                                                        |
| RNAscope Probe-Mm-Isl1-C3                                                                                        | ACD bio                                 | Cat # 451931-C3                                                                                                                     |
| RNAscope Probe-Mm-Tbx5-C2                                                                                        | ACD bio                                 | Cat # 519581-C2                                                                                                                     |
| <b>Chemicals, Peptides, and Recombinant Proteins</b>                                                             |                                         |                                                                                                                                     |
| CHIR99021                                                                                                        | Merck/Millipore                         | Cat # 361559; CAS: 252917-06-9                                                                                                      |
| PD0325901                                                                                                        | Selleck Chemicals                       | Cat # S1036; CAS: 391210-10-9                                                                                                       |
| Recombinant human VEGF                                                                                           | GIBCO                                   | Cat # PHC9394                                                                                                                       |
| Recombinant mouse FGFb                                                                                           | GIBCO                                   | Cat # PMG0035                                                                                                                       |
| L-ascorbic acid phosphate                                                                                        | Wako                                    | Cat # 013-12061; CAS: 1713265-25-8                                                                                                  |
| Cal-520                                                                                                          | AAT Bioquest                            | Cat# 21130                                                                                                                          |
| Nifedipine                                                                                                       | Sigma Aldrich                           | Cat # N7634; CAS: 21829-25-4                                                                                                        |
| DL-Isoproterenol hydrochloride                                                                                   | Sigma Aldrich                           | Cat # I5627; CAS: 51-30-9                                                                                                           |
| <b>Deposited Data</b>                                                                                            |                                         |                                                                                                                                     |
| Single cell RNA-seq data                                                                                         | This paper                              | GEO: GSE158999                                                                                                                      |
| <b>Experimental Models: Cell Lines</b>                                                                           |                                         |                                                                                                                                     |
| <i>Gata6-H2BVenus</i> <sup>(CoIA1TetO-Gata4-mCherry/+; R26<sup>M2rtTA/+</sup>;Gata6<sup>H2B-Venus/+</sup>)</sup> | Laboratory of Alfonso Martinez Arias    | KH2 (C57BL6 × 129Sv)                                                                                                                |
| <i>Fik1-GFP</i>                                                                                                  | Laboratory of Alexander Medvinsky       | E14Tg2a                                                                                                                             |
| <i>Mesp1-GFP</i>                                                                                                 | Laboratory of Cédric Blanpain           | N/A                                                                                                                                 |
| <i>Hcn4-GFP::Tbx1Cre-RFP</i>                                                                                     | Laboratory of Chulan Kwon               | N/A                                                                                                                                 |
| <i>Sox1-GFP::Brachyury-mCherry</i>                                                                               | Laboratory of David Suter               | CGR8, strain 129                                                                                                                    |
| <i>TCF/LEF-mCherry</i>                                                                                           | Laboratory of Alfonso Martinez Arias    | E14Tg2a                                                                                                                             |
| <b>Oligonucleotides</b>                                                                                          |                                         |                                                                                                                                     |
| Primers, see <a href="#">STAR Methods</a>                                                                        | This Paper                              | N/A                                                                                                                                 |
| <b>Software and Algorithms</b>                                                                                   |                                         |                                                                                                                                     |
| Fiji/ImageJ                                                                                                      | <a href="#">Schindelin et al., 2012</a> | <a href="https://imagej.net/Fiji">https://imagej.net/Fiji</a>                                                                       |
| GraphPad Prism                                                                                                   | GraphPad                                | <a href="https://www.graphpad.com/scientific-software/prism/">https://www.graphpad.com/scientific-software/prism/</a>               |
| Arivis Vision4D                                                                                                  | Arivis                                  | <a href="https://imaging.arivis.com/imaging-science/arivis-vision4d">https://imaging.arivis.com/imaging-science/arivis-vision4d</a> |
| Imaris                                                                                                           | Oxford Instruments                      | <a href="https://imaris.oxinst.com">https://imaris.oxinst.com</a>                                                                   |
| FlowJo                                                                                                           | BD                                      | <a href="https://www.flowjo.com">https://www.flowjo.com</a>                                                                         |

(Continued on next page)

**Continued**

| REAGENT or RESOURCE                             | SOURCE                                 | IDENTIFIER                                                                                                                                                                                |
|-------------------------------------------------|----------------------------------------|-------------------------------------------------------------------------------------------------------------------------------------------------------------------------------------------|
| MATLAB                                          | MathWorks                              | <a href="https://ch.mathworks.com/products/matlab.html">https://ch.mathworks.com/products/matlab.html</a>                                                                                 |
| Seurat v3.1                                     | <a href="#">Stuart et al., 2019</a>    | <a href="https://satijalab.org/seurat/">https://satijalab.org/seurat/</a>                                                                                                                 |
| Velocity v0.17                                  | <a href="#">La Manno et al., 2018</a>  | <a href="http://velocity.org">http://velocity.org</a>                                                                                                                                     |
| scVelo v0.2.1                                   | <a href="#">Bergen et al., 2020</a>    | <a href="https://pypi.org/project/scvelo/">https://pypi.org/project/scvelo/</a>                                                                                                           |
| Scanpy v1.5.1                                   | <a href="#">Wolf et al., 2018</a>      | <a href="https://scanpy.readthedocs.io/en/stable/">https://scanpy.readthedocs.io/en/stable/</a>                                                                                           |
| Harmony v1                                      | <a href="#">Korsunsky et al., 2019</a> | <a href="https://github.com/immunogenomics/harmony">https://github.com/immunogenomics/harmony</a>                                                                                         |
| DoubletFinder 2.0.3                             | <a href="#">McGinnis et al., 2019</a>  | <a href="https://github.com/chris-mcginnis-ucsf/DoubletFinder">https://github.com/chris-mcginnis-ucsf/DoubletFinder</a>                                                                   |
| Cellranger v3.1                                 | 10x Genomics Inc                       | <a href="https://support.10xgenomics.com/single-cell-gene-expression/software/downloads/latest">https://support.10xgenomics.com/single-cell-gene-expression/software/downloads/latest</a> |
| Other                                           |                                        |                                                                                                                                                                                           |
| Scripts and settings used for crescent analysis | This paper                             | <a href="https://go.epfl.ch/Crescent_Analysis">https://go.epfl.ch/Crescent_Analysis</a>                                                                                                   |
| scRNA-seq analysis scripts                      | This paper                             | <a href="https://github.com/nbroguiere/Cardiac_Gastruloids">https://github.com/nbroguiere/Cardiac_Gastruloids</a>                                                                         |

**RESOURCE AVAILABILITY****Lead Contact**

Further information and requests for resources and reagents should be directed to and will be fulfilled by the Lead Contact, Matthias Lutolf ([matthias.lutolf@epfl.ch](mailto:matthias.lutolf@epfl.ch)).

**Materials Availability**

This study did not generate new unique reagents.

**Data and Code Availability**

The single cell RNA-seq data generated during this study are available at NCBI GEO (<https://www.ncbi.nlm.nih.gov/geo/>) under the accession number GEO: GSE158999. The complete code for reproduction or for exploration of the results is available on [https://github.com/nbroguiere/Cardiac\\_Gastruloids](https://github.com/nbroguiere/Cardiac_Gastruloids). All scripts and settings used for volumetric crescent analysis are available at [https://go.epfl.ch/Crescent\\_Analysis](https://go.epfl.ch/Crescent_Analysis).

**EXPERIMENTAL MODEL AND SUBJECT DETAILS****Cell Lines**

mESCs were cultured at 37°C, 5%CO<sub>2</sub> in DMEM supplemented with 10% Embryonic Stem Cell qualified FBS (GIBCO), NEAA, Sodium Pyruvate, β-mercaptoethanol, 3 μM CHIR99021 (Chi), 1 μM PD0325901 and 0.1 μg ml<sup>-1</sup> LIF. For cell passaging, cells were detached using StemPro Accutase (GIBCO). *Gata6-Venus* ([Freyer et al., 2015](#)), *Fik1-GFP* ([Jakobsson et al., 2010](#)), *Mesp1-GFP* ([Bondue et al., 2011](#)) and *Hcn4-GFP::Tbx1Cre-RFP* ([Andersen et al., 2018](#)) cells were cultured on gelatin-coated tissue culture flasks; *Sox1-GFP::Brachyury-mCherry* ([Deluz et al., 2016](#)) and *TCF/LEF-mCherry* ([Faunes et al., 2013](#); [Ferrer-Vaquier et al., 2010](#)) cells on tissue-culture flasks without coating. If not differently specified, *Sox1-GFP::Brachyury-mCherry* cells were used for our experiments. HUVECs were cultured in EGM-2 medium (Lonza). All cells were routinely tested for Mycoplasma with Mycoalert mycoplasma detection kit (Lonza) or by PCR.

**METHOD DETAILS****Gastruloid culture**

Gastruloids were generated as previously described ([Baillie-Johnson et al., 2015](#)). Briefly, 300-700 mESCs were plated in 40 μL N2B27 in 96-well Clear Round Bottom Ultra-Low Attachment Microplates (7007, Corning). After 48 h, 150 μL of N2B27 containing 3 μM Chi were added to each well. After 72 h, medium was changed with N2B27. Starting from 96 h, the protocol was optimized as described in [Figure S1A](#). At 96 h, gastruloids were transferred in Ultra-Low Attachment 24-well Plates (3473, Corning) in 100 μL of medium, plus 700 μL of fresh N2B27 containing 30ng ml<sup>-1</sup> bFGF (PMG0034, GIBCO), 5ng ml<sup>-1</sup> VEGF 165 (PHC9394, GIBCO) and 0.5mM L-ascorbic acid phosphate (013-12061, Wako) (N2B27+++), and cultured on an orbital shaker placed at 37°C, 5%CO<sub>2</sub> at 100rpm (VWR mini shaker). From 120 h onward, half medium was changed daily. Unless differently specified,



N2B27+++ was applied from 96 to 144 h, while from 144 h to 168 h N2B27 was used for medium change. To generate *Hcn4-GFP::Tbx1Cre-RFP* gastruloids, 800-1200 cells were employed, due to initial difficulties in cell aggregation and extreme susceptibility to Chi treatment. For the same reason, Chi pulse for this line was done with 1  $\mu$ M Chi, with the exact same modalities described for the other lines.

### Live imaging and cell tracking

Bright-field live imaging of beating gastruloids was performed with a Nikon Ti inverted microscope equipped with an incubation chamber at 37°C, 5%CO<sub>2</sub>. Light-sheet live imaging of *Fik1-GFP* and *Mesp1-GFP* gastruloids was performed with a prototype of LS1 Live inverted light-sheet microscope (Viventis Microscopy Sarl, Switzerland), at 37°C, 5% CO<sub>2</sub>. A volume of 150-200  $\mu$ m was acquired with a Z spacing of 2-3  $\mu$ m between slices and pictures were captured every 20 min for *Fik1-GFP* gastruloids and every 10 min for tracking of *Mesp1*<sup>+</sup> cells. *Fik1-GFP* light-sheet video montages were obtained with the Arivis Vision4D software. To track *Mesp1*<sup>+</sup> cells in Gastruloids from 96 to 120 h, LS1 live light-sheet images were processed with the Fiji Mastodon plugin, using a semi-automatic tracking. Subsequently, Mastodon files were exported for Mamut, and the Fiji (Schindelin et al., 2012) Mamut plugin was used to display cell tracks as shown in Figure 1.

### Immunofluorescence, confocal and light-sheet imaging on fixed samples

Immunofluorescence on whole mount gastruloids was performed as previously described (Baillie-Johnson et al., 2015). Briefly, gastruloids were washed in PBS and fixed in 4% PFA for 2 h at 4°C while shaking. Samples were washed 3 times in PBS and 3 times (10 min each) in blocking buffer (PBS, 10%FBS, 0,2%Triton X-100), then blocked for 1 h at 4°C in blocking buffer. Gastruloids were then incubated O/N with primary antibodies in blocking buffer, at 4°C while shaking. The day after, gastruloids were washed 4 times (20 min each) with blocking buffer, at 4°C while shaking, and incubated O/N with secondary antibodies and DAPI (2  $\mu$ g ml<sup>-1</sup>, Sigma-Aldrich) in blocking buffer, at 4°C while shaking. The day after, gastruloids were washed for 1h with blocking buffer, at 4°C while shaking, then rinsed in PBS, 0,2%FBS, 0,2% Triton X-100 and mounted on Superfrost plus glass slides (ThermoFisher) with Floromount-G for confocal imaging (Southern Biotech). The following primary antibodies were used: mouse anti-Gata4 (1:500, Santa Cruz Biotechnology, G-4); chicken anti-GFP (1:750, Aves Labs); goat anti-Brachyury (1:300, Santa Cruz Biotechnology, C-19); rabbit anti-Brachyury (1:500, Abcam); rat anti-CD31 (1:100, BD, MEC 13.3), mouse anti-cardiac troponin T (1:100, ThermoFisher, 13-11), rabbit anti-E-Cadherin (1:500, Cell Signaling, 24E10). The following secondary antibodies were used: donkey anti-chicken 488 AlexaFluor (1:500, Jackson ImmunoResearch); donkey anti-goat AlexaFluor 568 (1:500, ThermoFisher); goat anti-rat AlexaFluor 568 (1:500, ThermoFisher); goat anti-mouse AlexaFluor 647 (1:500, ThermoFisher); donkey anti-rabbit 568 (1:500, ThermoFisher). Confocal pictures were acquired with a Zeiss LSM 700 inverted confocal microscope equipped with a Axiocam MRm black and white camera in the EPFL bioimaging and optics facility. Stitched images were obtained using the Fiji/ImageJ stitching plugin. For light-sheet imaging (Figures 4 and S4), samples were mounted in 1% low-melt agarose and cleared overnight with CUBIC mount solution (Lee et al., 2016). Light-sheet imaging was performed on a Zeiss Light-sheet Z1 microscope equipped with a Plan-Neofluar 20x/1.0 Corr nd = 1.45 objective. Light-sheet images were further processed with Imaris software, for 3D rendering and surface generation.

### RNA extraction and qRT-PCR

RNA was extracted from gastruloids with the RNeasy Micro kit (QIAGEN), according to manufacturer's instructions and quantified with a spectrophotometer (ND-1000, Nanodrop). 1  $\mu$ g of RNA was reverse-transcribed with the iScript cDNA Supermix kit (Biorad). cDNA was diluted 1:10 and 1.5  $\mu$ L of cDNA per reaction were used, in a total volume of 10  $\mu$ L. 384 well plates were prepared using a robotized liquid handling platform (Hamilton Microlab Star). qPCR was run with a 7900HT Fast PCR machine (Applied Biosystems), using Power SYBR Green PCR Master Mix (Applied Biosystems), with an annealing temperature of 60°C. Gene expression was normalized on  $\beta$ -actin expression. Relative fold expression was calculated with the 2<sup>- $\Delta\Delta$ CT</sup> method. 500nM of the following primers were used: *Mesp1* FOR GTCTGCAGCGGGGTGCTGTG; *Mesp1* REV CGGCGGCGTCCAGGTTTCTA; *Nkx2.5* FOR CACATTTTACCCGGGAGCCT; *Nkx2.5* REV ACCAGATCTTGACCTGCGTG; *Hcn4* FOR GTGGGGGCCACCTGCTAT; *Hcn4* REV GTCGGGTGTCAGGCGGGA;  $\alpha$ -actinin FOR GGGCTATGAGGAGTGGCTATT;  $\alpha$ -actinin REV AGTCCTTCTGCAGCAAGATCT; *RyR2* FOR TGCATGAGAGCATCAAACGC; *RyR2* REV CGCGGAGAGAGGCATTACAT; *Tbx5* FOR GGCATGGAAGGAATCAAGGTG; *Tbx5* REV TTTGGATTAAGGCCAGTCAC; *Tbx1* FOR CTGTGGGACGAGTTCAATCAG; *Tbx1* REV TTGTCTACTACGGGCACAAAG; *Isl1* FOR ATGATGGTGGTTTACAGGCTAAC; *Isl1* REV TCGATGCTACTTCACTGCCAG; *FGF10* FOR TCAGCGGGACCAAGAATGAAG; *FGF10* REV CGGCAACAACCTCCGATTTC;  $\beta$ -actin FOR CTGTGCGAGTCGCGTCCACC;  $\beta$ -actin REV CGCAGCGATATCGTCATCCA.

### Single cell RNA-seq

Gastruloids at 96, 120, 144 and 168h were collected, washed twice in PBS, and dissociated with TrypLE Express (ThermoFisher) for 8 min at 37°C, with mechanical dissociation at half time. The enzymatic reaction was blocked with a medium containing 10% ES qualified serum. Samples were washed with PBS and centrifuged for 5 min at 200 g. Cells were resuspended in N2B27 medium and strained at 40  $\mu$ m before counting. All samples showed a cell viability > 90% after processing, based on Trypan blue exclusion. Libraries for single cell gene expression profiling were constructed with 10x Genomics Chromium 3' chemistry v3.1,

and sequenced with Illumina HiSeq 4000 (read length: barcodes 28, index 8, transcript 91) at the EPFL Gene Expression Core Facility (GECF) according to standard protocols. Reads were aligned to the mouse genome mm10 with cellranger v3.1. The raw count matrices were imported in R v3.6 with Seurat v3.1 (Stuart et al., 2019). The complete code for reproduction or for exploration of the results is available on [[https://github.com/nbroguiere/Cardiac\\_Gastruloids](https://github.com/nbroguiere/Cardiac_Gastruloids)]. In short, live cells were selected based on gene counts (> 2000) and mitochondrial content (1.5%–15%). The *in vivo* gastrulation and early organogenesis dataset from Pijuan-Sala et al. (2019) was used as an atlas. An scmap classifier (Kiselev et al., 2018) trained on the *in vivo* data was used to do a first estimation of cell types present in the gastruloids, for the needs of doublet removal and alignment. Data was normalized to 10 000 counts per cell (raw counts of unique molecule identifiers were approx. 30–40 k per cell depending on the condition), and log transformed using natural logarithm and a pseudo-count of 1. Gene expression refers to such log-normalized count values throughout the manuscript. Doublets were removed with DoubletFinder 2.0.3 (McGinnis et al., 2019). For the alignment, extraembryonic tissues, which are absent in gastruloids, were excluded from the *in vivo* data. Alignment of *in vitro* and *in vivo* data was done based on the intersection of variable genes, centered to their mean and divided by their standard deviation (referred to as scaled gene expression throughout). Both datasets were projected in the principal component (PC) space of the atlas, and batch corrected individually with Harmony v1 (Korsunsky et al., 2019) in ‘atlas mode’ (keeping one of the replicates as a constant so that the batch corrected coordinates remain comparable with each other). Gastruloid and embryo data were then aligned with Harmony in atlas mode. During this alignment, the cell types almost entirely missing in gastruloids according to the scmap transfer (less than 2 cells per cell type, blood/erythroid cells and allantois) were temporarily excluded to limit over-alignment artifacts. The resulting Harmony coordinates were used to perform a refined identity transfer from the Pijuan-Sala et al. (2019) annotations, based on nearest centroid, by analogy with scmap, and to compute an integrated UMAP. To best preserve global structure despite of the large cell number, we first performed a UMAP on 200 cells per cell type, initialized on a diffusion map and with a number of neighbors of 300 in uwot v0.1.5. We then used this layout supplemented with noise to initialize the UMAP with all cells. Not all continuity relationships could simultaneously appear in 2D projections, so 3D and 4D UMAPs were also used for data exploration. The alignment was confirmed to be biologically meaningful by manually verifying that highly variable genes and canonical marker genes were overall well matched. In addition, the similarity of the gene expression by cell type when comparing embryo and gastruloids was used as a summary statistic for the alignment and identity transfer accuracy (based on the scaled expression of the union of variable genes, using cosine metric). Since biological details can be lost in aligned datasets, the gastruloids were then re-analyzed independently in a similar fashion: variable genes, scaled gene expression, principal components, and Louvain clustering were computed for gastruloids alone. Markers were defined as genes which are expressed in less than 50% of the cells in the dataset (we considered genes that are ubiquitously expressed not useful as markers), and are significantly upregulated in a given cluster ( $p < 1e-3$ , fold change > 150%). Clusters were assigned to cell types based on their markers, and since some Louvain clusters were fused by similarity, markers were re-computed by cell type (Table S1). The UMAP view of gastruloids alone was initialized on the aligned gastruloid-embryo UMAP view, to keep the overall orientation constant and thus aid visualization, but let to re-converge for 1000 epochs to ensure local structures are not influenced by the atlas. A close-up view of heart fields development was generated by subsetting the clusters which are on the trajectories between epiblasts and cardiac cells, and recomputing scaled gene expression, PCs, and UMAP (initialized on the previous view for the same reason). For signature visualization on UMAP plots, the sum of the log-normalized expression of genes in the signature was computed, and normalized between its average value, considered as zero enrichment, to its 99<sup>th</sup> quantile, considered most enriched. For RNA velocity, splicing information was recovered using velocity v0.17 (La Manno et al., 2018) based on the cell ranger alignment. Trajectories were then inferred from the RNA-velocity using scVelo v0.2.1 (Bergen et al., 2020) in deterministic mode, importing the view and annotations from R to Python v3.7.2 using scanpy v1.5.1 (Wolf et al., 2018).

### RNAscope

Gastruloids were washed in PBS and fixed O/N in 4% PFA, at 4°C while shaking. The day after, samples were washed 3 times in PBS and included in HistoGel (ThermoFisher) blocks. HistoGel blocks were then processed with a Tissue-Tek VIP 6 AI Vacuum Infiltration Processor (Sakura) and included in paraffin. Paraffin blocks were cut at 4 μm with a Hyrax M25 microtome (Zeiss). RNA-scope was performed with the ACDBio Manual assay kit using RNAscope Probe-Mm-Tbx1 (481911), RNAscope Probe-Mm-Isl1-C3 (451931-C3) and RNAscope Probe-Mm-Tbx5-C2 (519581-C2) probes, according to manufacturer’s instructions. Polr2a-C1, Ppib-C2 and Ubiquitin-C3 probes were used as positive and negative controls. Pictures were acquired with an upright Leica DM5500 scanning microscope equipped with a CCD DFC 3000 black and white camera. Tile scans were directly stitched by the Leica LAS X imaging software.

### Flow cytometry analysis and FACS

Gastruloids were collected, washed in PBS, and digested in 4mg ml<sup>-1</sup> dispase I (Roche), 3mg ml<sup>-1</sup> collagenase IV (GIBCO) and 100 μg ml<sup>-1</sup> DNase I (Roche) in PBS (2 digestion cycles at 37°C, 5 min each; gentle pipetting was applied between the two cycles to mechanically dissociate the gastruloids). Digestion was blocked with DMEM containing 10% FBS, then samples were centrifuged and the cell pellet was resuspended in sorting buffer (PBS, 5%FBS, 1mM EDTA, 1%P/S) for antibody staining. Samples were incubated for 1 h on

ice with antibodies, and 30min on ice with Aqua live/dead fixable dead cell stain kit (405/525nm, Invitrogen) or 10 min on ice with DAPI. Unstained, FMO and single-color samples were used as controls. The following antibodies were used: anti CD31-PE 1:1200 (BD, MEC 13.3), anti VEGFR2/Flk1-APC 1:200 (Biolegend, Avas12); anti CXCR4-APC 1:100 (BD, 2B11). Samples were analyzed with a BD LSR II flow cytometer, data were processed using FlowJo. Cell sorting was performed using a BD FACSAria Fusion cell sorter.

### **In vitro angiogenesis assay**

168-h *Flk1-GFP* gastruloids were collected and digested as described above for FACS analysis. *Flk1*<sup>+</sup> and *Flk1*<sup>-</sup> cells were isolated through cell sorting using a BD FACSAria Fusion cell sorter. 5×10<sup>4</sup> cells per condition were plated in IBIDI μ-angiogenesis slides pre-coated with 10 μL reduced growth factor Matrigel (Corning) in the lower chamber. Undifferentiated mESCs and HUVEC were used as negative and positive controls, respectively. Live imaging of tube formation was performed with a Nikon Ti inverted microscope equipped with an incubation chamber at 37°C, 5% CO<sub>2</sub>, with acquisitions every 15 min.

### **Calcium imaging**

To image calcium fluxes, gastruloids were incubated for 1 h with 8 μM Cal-520 (AAT Bioquest) at 37°C, 5% CO<sub>2</sub>. Gastruloids were then transferred to fresh medium before imaging. Imaging was performed with a Light-sheet Z1 microscope (Zeiss) equipped with an environmental chamber to maintain gastruloids at 37°C and 5% CO<sub>2</sub>. For imaging, gastruloids were embedded in 1% low melt agarose and the chamber was filled with culture medium. Nifedipine (Sigma Aldrich, 10 μM) and isoproterenol (isoprenaline hydrochloride, Sigma I5627, 1 μM) were added with a syringe directly to the imaging chamber during acquisition. The analysis of calcium spikes was performed with the Fiji Stacks-plot Z axis profile plugin. The baseline intensity was normalized to the minimum value over 10 s. The ratio of fluorescence intensity to baseline intensity was calculated and results are shown as the percentage of increase over the baseline, which shows the relative changes in intracellular Ca<sup>2+</sup>.

### **Crescent analysis**

Analysis of crescent geometrical properties was performed on *Sox1-GFP::Brachyury-mCherry* gastruloids using a custom-made MATLAB script for Imaris files with a Imaris XT feature and EasyXT. Initially, we generated artificial shapes to be used as reference for defined geometrical metrics. Using a custom script (*crescent\_generator.m*), 3D objects were generated to mimic crescent structures with different characteristics. To do so, the script creates two spot objects, makes channels from these spots and finally subtracts one channel to the other. To analyze surfaces, 3D images from non-beating organoids at 144 h and beating organoids at 168 h were acquired with a Light-sheet Z1 microscope (Zeiss) after clearing, as described above. For each individual stack, a surface was created using a dedicated user interface (*GUI\_DetectAndAnalyze.m*), defining the object that should be created for each channel (*settings.m*). Due to variability in background and signal intensity, the threshold (absolute intensity) was adjusted manually for each surface. Using a custom script (*makeCroissantMeasure\_final.m*) geometrical measurements were computed and the results exported in csv table. In the graph, we plot the measure of Sparseness, which is described as the ratio between the volume of the object and the volume of the best fitted ellipsoid. All scripts and settings used for analysis are available at [https://go.epfl.ch/Crescent\\_Analysis](https://go.epfl.ch/Crescent_Analysis).

## **QUANTIFICATION AND STATISTICAL ANALYSIS**

### **Quantification of immunofluorescence signals along the A/P axis**

Quantification of immunofluorescence signals along the A/P axis of gastruloids was performed similarly to what previously described (Baillie-Johnson et al., 2015; Turner et al., 2017). Whole gastruloid light-sheet images were re-oriented along the A/P axis, to make sure both poles were visible in the resulting projected image, using a Fiji BigDataViewer (Pietzsch et al., 2015) plugin (<https://github.com/bigdataviewer/bigdataviewer-playground>). The first mipmap level of the re-oriented data was exported with a voxel size of 1 micron in XY and 2 microns in Z, and mean projected along the Z axis. Confocal images (for *Gata6-Venus* gastruloids at 96h) were directly processed. Average projections were used to draw a line with a thickness spanning the full or most of the gastruloid area from the posterior to the anterior pole of the gastruloid, to define directionality. Posterior pole was defined as the one expressing Brachyury. Due to frequent bending of the 168h gastruloid posterior portion on itself, the line was adjusted to avoid unwanted measuring of the same area twice, which would create aberrations. The “Straighten” tool in Fiji was used to double check for every image that the line was drawn to correctly capture gastruloid full length along the A/P axis, with no aberrations or multiple measures of the same area. A few 168h gastruloids with the posterior portion completely bended and touching the main gastruloid body could not be correctly straightened and were therefore excluded from analyses. To avoid background signal interference, a mask was created on the DAPI channel, and all background pixels outside this mask were converted to a “not a number” value. Finally, signal intensity was measured based on the Fiji “Plot Profile” tool, and values obtained were normalized to a 0-1 scale to be able to compare results from different gastruloids. The graphs display a smoothed curve, obtained with a LOWESS function in Graphpad Prism, and the relative standard deviation.

### Statistics

All data shown in column graphs are expressed as mean  $\pm$  SD, apart from the graph showing Calcium spikes frequency, which is expressed as mean  $\pm$  whiskers from min to max. All other graphs show single data points. Statistical analysis between two columns was performed using two-tailed unpaired Student's t test, whereas data containing more than two experimental groups were analyzed with one-way analysis of variance followed by Bonferroni's test. To calculate the significance of the percentage of increase over baseline frequency after Isoproterenol administration, we applied a one sample t test. Statistical significance was calculated using the Graphpad Prism software, that was also used to generate all graphs. For each experiment, the exact value of n and what n represents can be found in the corresponding figure legends.

\*p < 0.05; \*\*p < 0.01; \*\*\*p < 0.001; confidence intervals 95%; alpha level 0.05.

**Cell Stem Cell, Volume 28**

## **Supplemental Information**

### **Capturing Cardiogenesis in Gastruloids**

**Giuliana Rossi, Nicolas Broguiere, Matthew Miyamoto, Andrea Boni, Romain  
Guet, Mehmet Girgin, Robert G. Kelly, Chulan Kwon, and Matthias P. Lutolf**

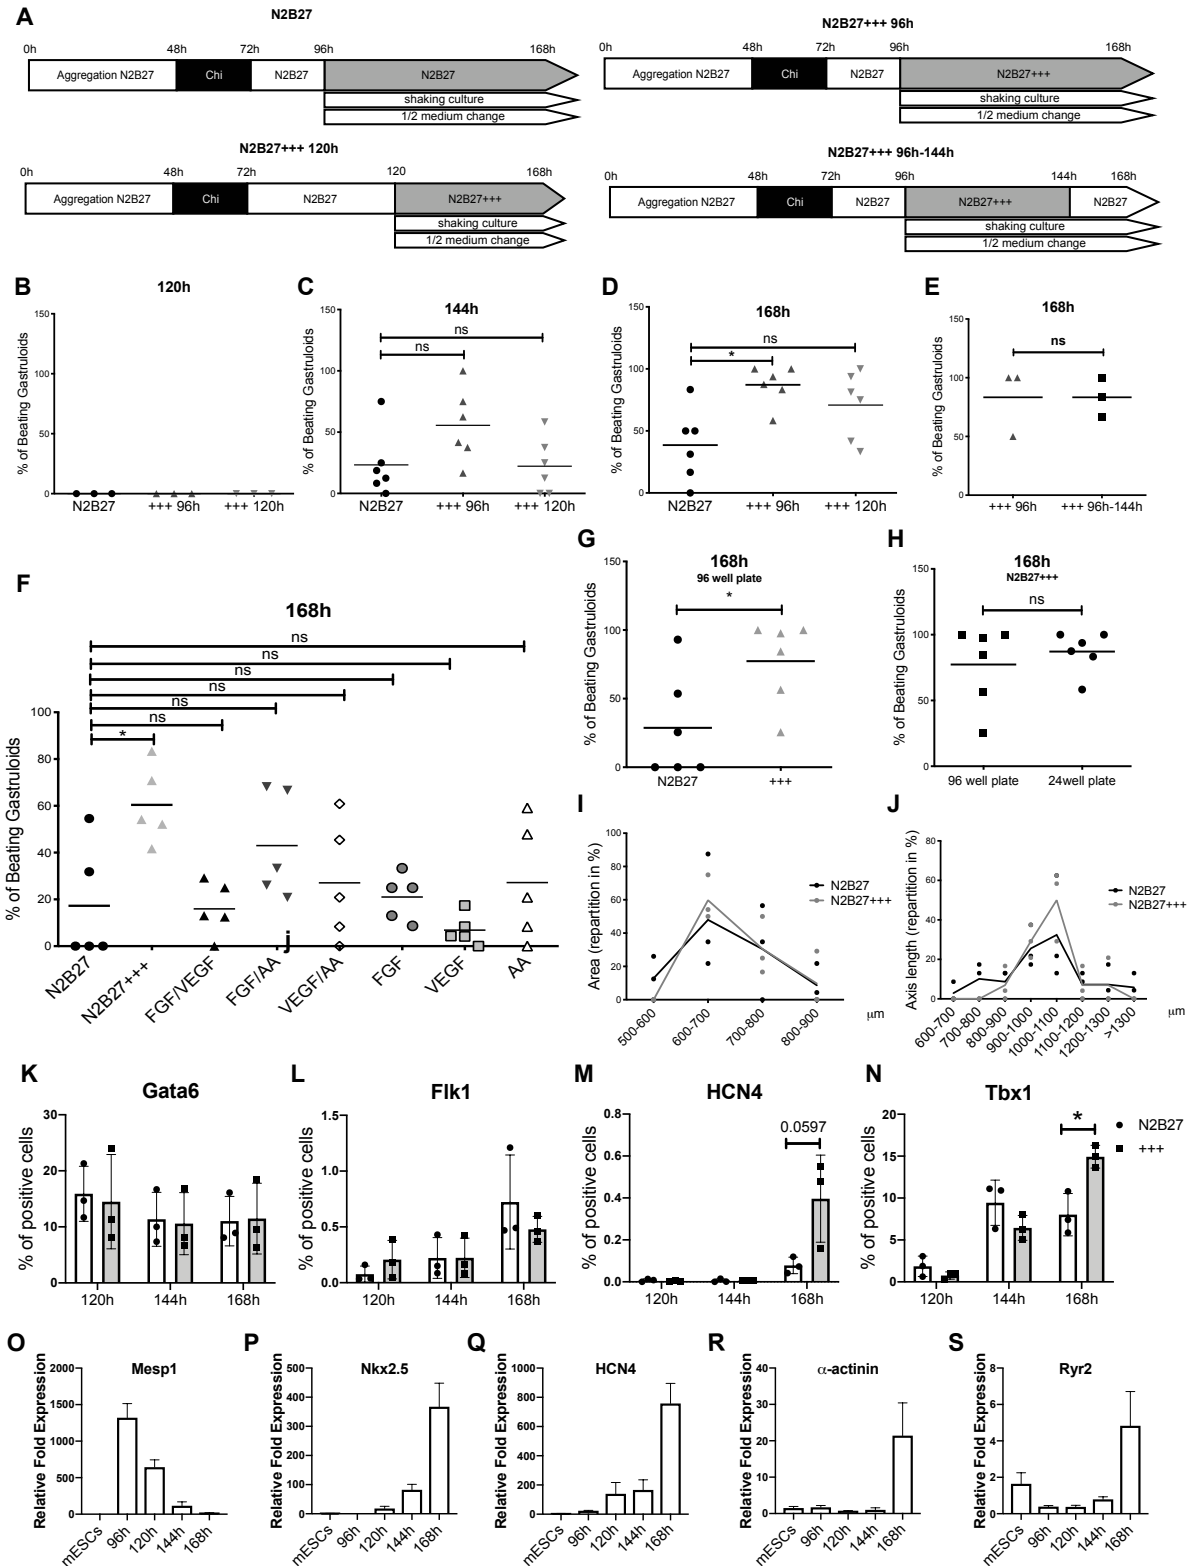

**Figure S1 | Comparison between N2B27 and N2B27+++ culture conditions. Related to Fig. 1. A,** Schematics of the different culture conditions tested. **B-E,** Percentage of beating gastruloids from 120 to 168h in the different conditions. **F,** Exposure to N2B27+++ induces beating at higher frequencies compared to exposure to single factors or couples. **G, H,** Frequencies of beating gastruloids grown in 96well plates (**G**) and comparison with those grown in 24 well plates from 144h (**H**). Each dot in **B-H** represents an independent experiment. **I-J,** Quantification of area and axis of gastruloids at 168h grown in N2B27 or N2B27+++ . Mean of  $n=3$  independent experiments. **K-N,** FACS analysis graphs showing the percentages of reporter positive



cells in N2B27 or N2B27+++ at different time points.  $n=3$  independent experiments. **O-S**, qPCR gene expression profiles of cardiac genes in gastruloids from 96 to 168 h. Data are expressed as relative fold expression compared to mESCs in  $n = 4$  independent experiments. Data are represented as individual data points or mean  $\pm$  SD.

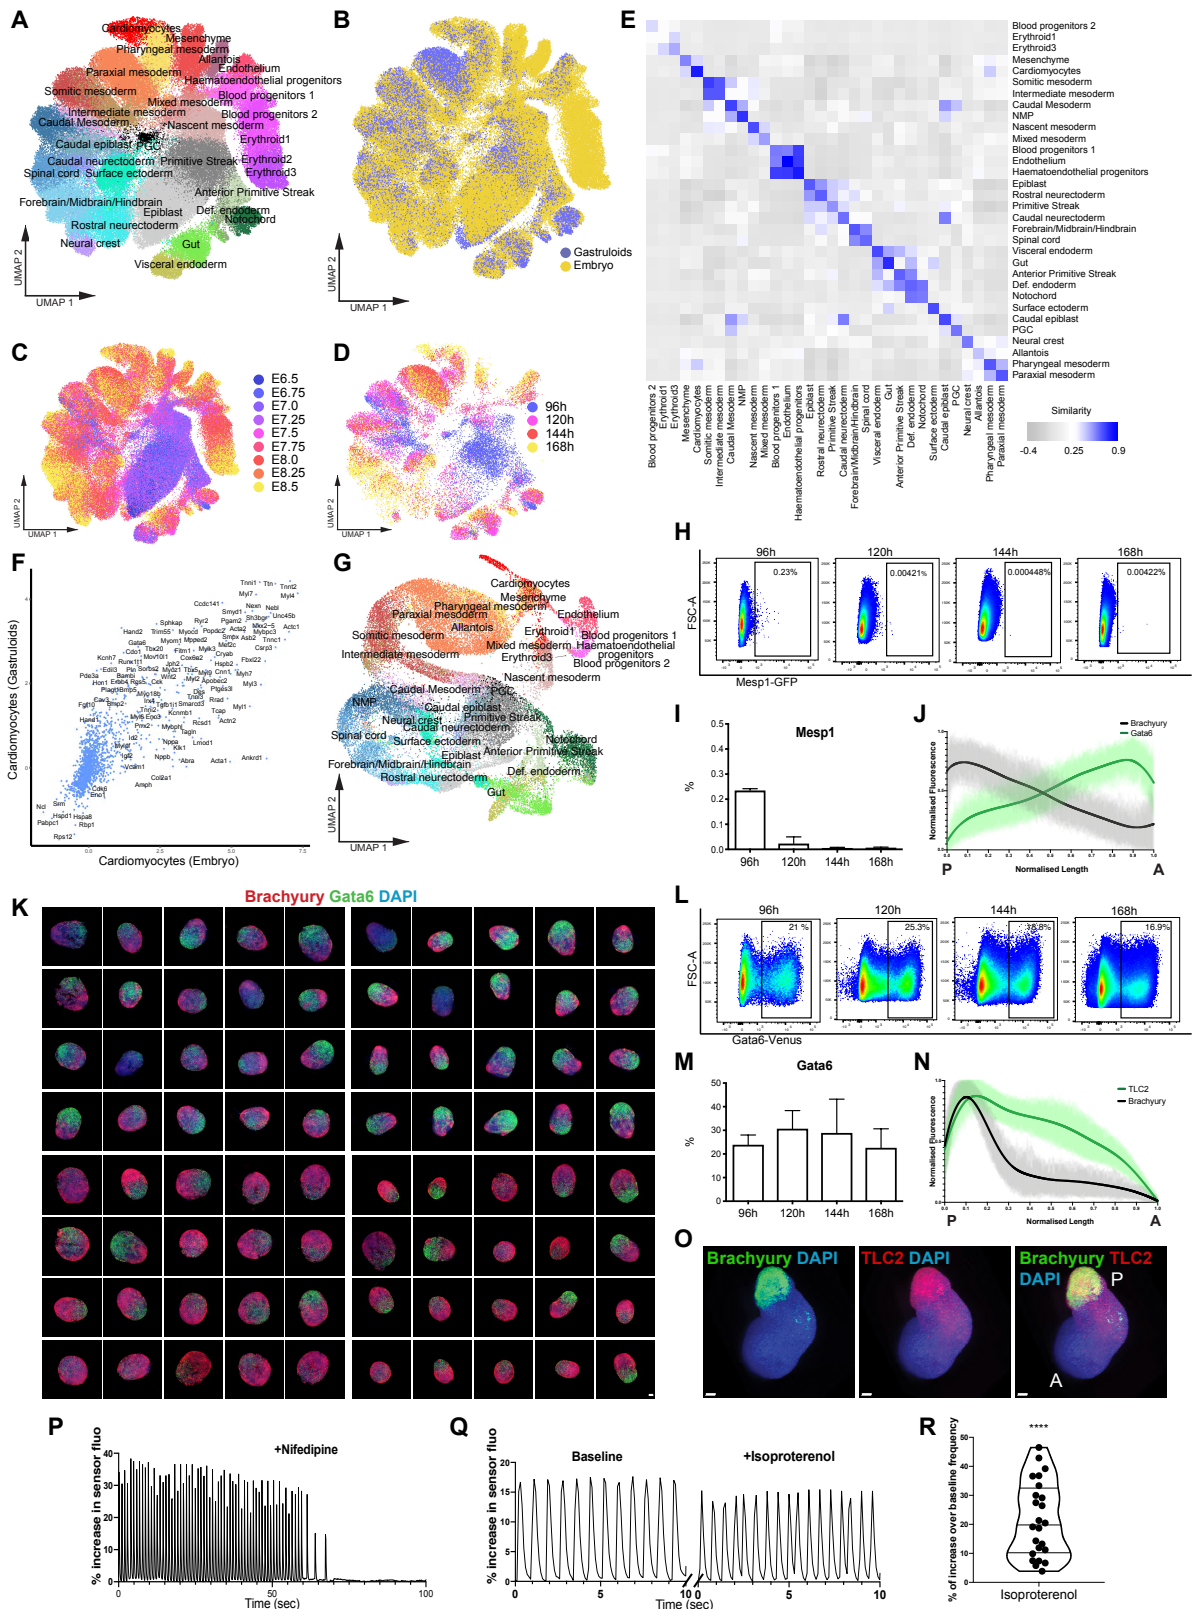

**Figure S2 | Development of cardiovascular progenitors in gastruloids. Related to Fig. 1 and Fig. 2.** A, B, UMAP plots showing the alignment of embryonic and gastruloid cells. The *in vivo* cell identities as annotated by (Pijuan-Sala et al., 2019) were transferred to their analogs in gastruloids based on the alignment (A) and the relative distribution of gastruloid and embryo cells within the UMAP is shown in (B). C, D, Correspondence between embryonic stages (C) and gastruloid time points (D) based on the aligned view. E,

Heat map showing the similarity by cell type between embryo and gastruloid cells in **A** (cosine similarity based on the scaled expression of all variable genes). **F**, Scatterplot showing the scaled variable gene expression in gastruloids vs. embryo cardiomyocytes. **G**, Transferred annotations from (Pijuan-Sala et al., 2019) shown on the UMAP projection of **Fig. 1D**. **H, I**, FACS analysis of *Mesp1-GFP* gastruloids from 96 to 168h (**H**) and relative quantification (**I**).  $n=2$  independent experiments. **J, K**, Unbiased collection of gastruloids from 4 independent experiments showing *Gata6* and Brachyury signals along the A/P axis of gastruloids at 96h (**K**) and relative quantification (**J**).  $n=104$  gastruloids from 4 independent experiments. **L, M**, FACS analysis plots (**L**) and quantification (**M**) of *Gata6-Venus* gastruloids from 96 to 168.  $n=2$  independent experiments. **N, O**, Representative pictures of TLC2 gastruloids at 168h, showing expression of Brachyury and TLC2 (*TCF/LEF-mCherry*) (**O**) and relative quantification of the signals along the A/P axis (**N**).  $n=54$  gastruloids from 4 independent experiments. **P-R**, Treatment of 168 h gastruloids with Nifedipine ( $n=9$  gastruloids) (**P**) or Isoproterenol (**Q, R**) abolishes or fastens calcium spiking in the gastruloid cardiac portion, respectively. Graph in (**Q**) shows representative calcium spikes of gastruloids before and after Isoproterenol treatment, and graph in (**R**) the percentage of increase over baseline frequency of gastruloids after Isoproterenol treatment.  $n=24$  gastruloids. A: anterior; P: posterior. Scale bars, 100 $\mu$ m. Data are represented as individual data points or mean  $\pm$  SD.

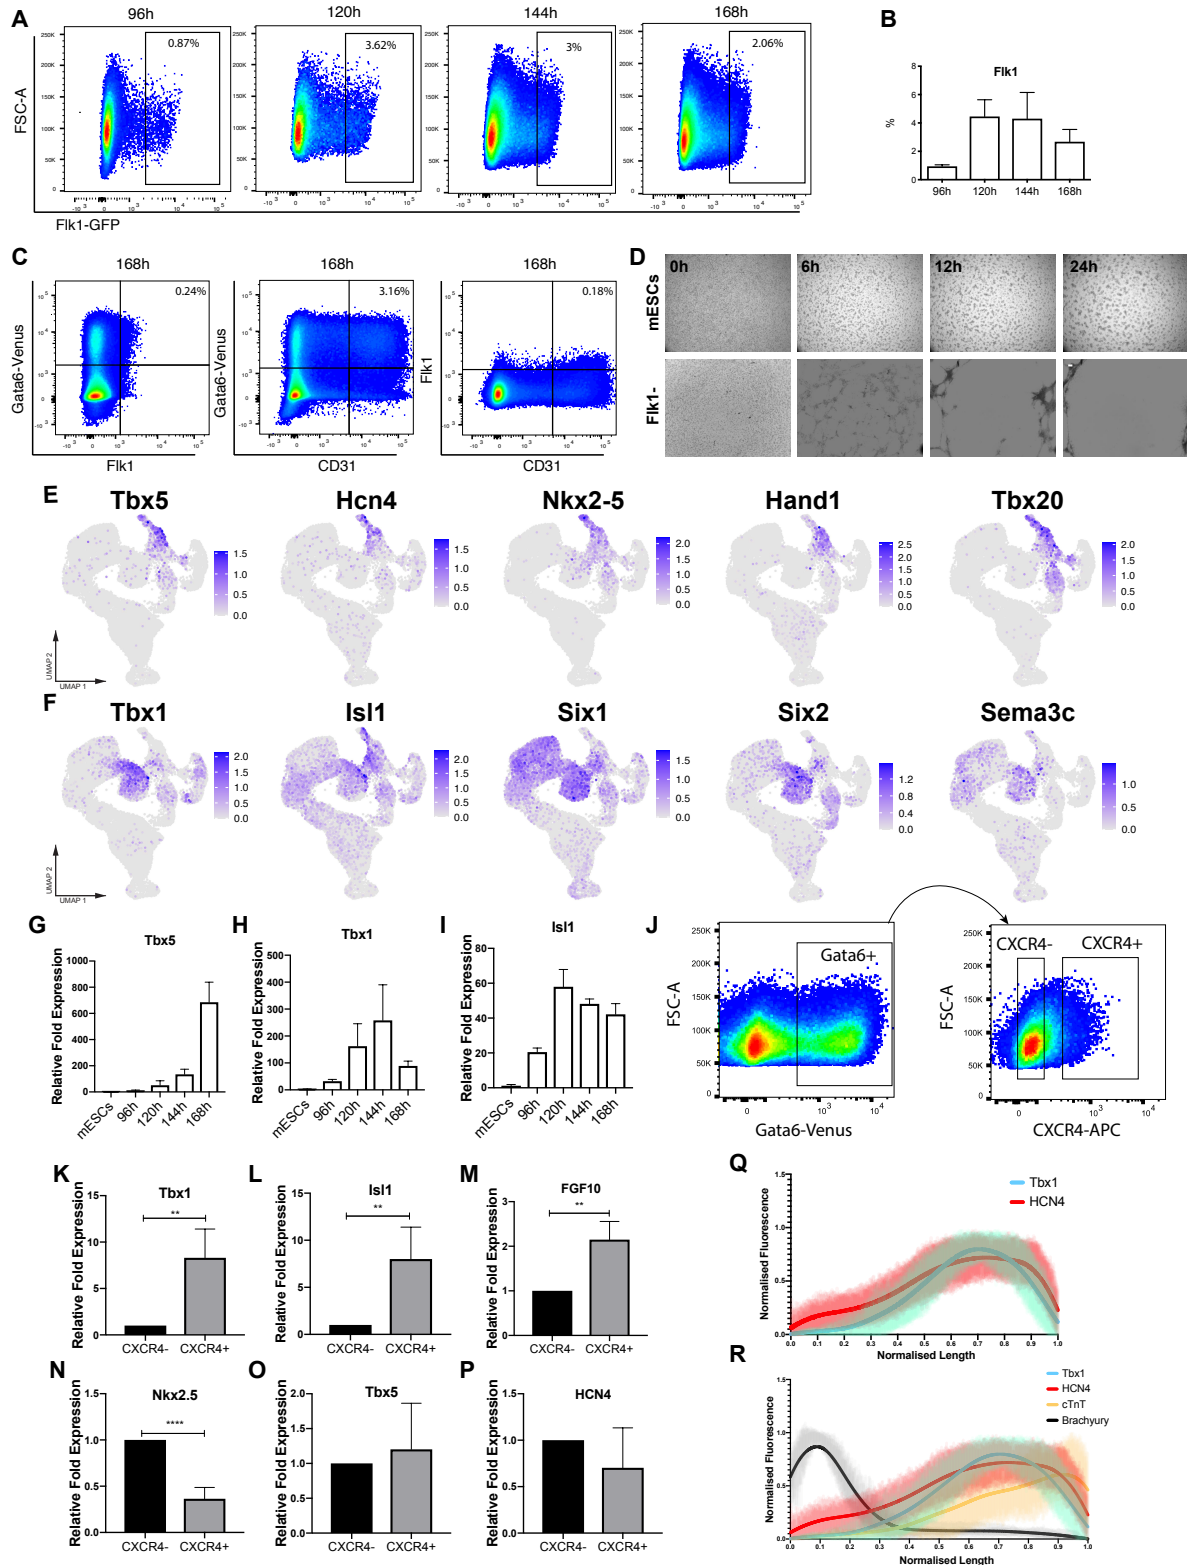

**Figure S3 | Characterization of cardiovascular progenitors. Related to Fig. 3 and Fig. 4.** A, B, FACS analysis of *Flik1-GFP* gastruloids from 96 to 168 (A) and relative quantification (B).  $n=2$  independent experiments. C, FACS analysis of *Gata6-Venus* gastruloids showing co-expression of *Flik1* and *CD31*.  $n=2$  independent experiments. D, Angiogenesis assay showing inability of undifferentiated mESCs and *Flik1* cells to form vascular-like tubes. E, F, Expression of FHF (E) and SHF (F) marker genes. G-I, qPCR showing expression levels of markers of FHF (G) and SHF (H, I) in gastruloids from 96 to 168 h. Data are expressed as relative fold expression compared to mESCs in  $n = 4$  independent experiments. J, Representative plot

showing the gating strategy used to isolate SHF-enriched progenitors. **K-P**, Expression levels of markers of SHF (**K-M**) and FHF (**N-P**) in *Gata6*<sup>+</sup>/*CXCR*<sup>-</sup> and *Gata6*<sup>+</sup>/*CXCR*<sup>+</sup> cells isolated from gastruloids at 168 h. Data are expressed as relative fold expression compared to *Gata6*<sup>+</sup>/*CXCR*<sup>-</sup> cells in *n* = 4 independent experiments. **Q, R**, Quantification of *Tbx1*, *Hcn4*, cTnT and Brachyury signals along the A/P axis in gastruloids. *n*=42 gastruloids stained for *Tbx1*, *Hcn4* and cTnT and *n*=26 gastruloids stained for *Tbx1*, *Hcn4* and Brachyury. A: anterior; P: posterior. Scale bar, 100µm. Data are represented as mean ± SD.

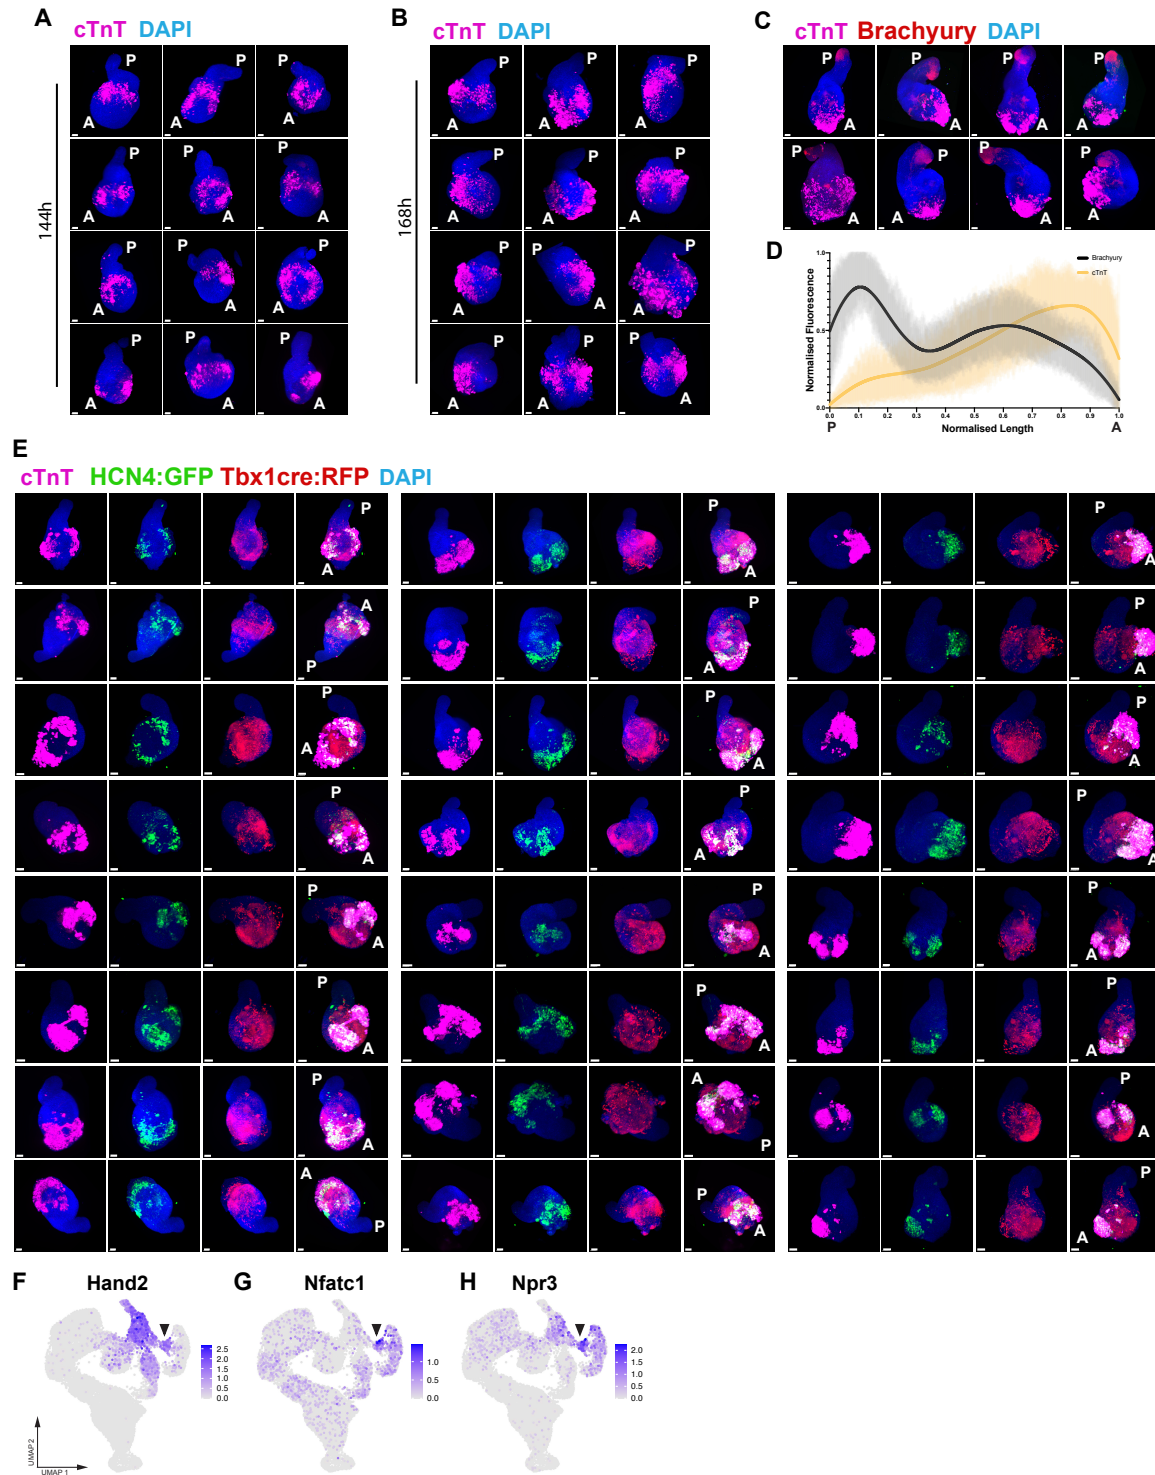

**Figure S4 | Characterization of the gastruloid cardiac portion. Related to Fig. 4 and Fig. 5.** A, B, Representative collection of *Sox1-GFP::Brachyury-mCherry* gastruloids at 144h (A) and 168h (B), showing expression of cTnT in the anterior domain.  $n=4$  independent experiments. C, D, Staining (C) and relative quantification (D) of cTnT and Brachyury signals along the A/P axis of gastruloids at 168h.  $n=38$  gastruloids from 2 independent experiments. E, Representative collection of *Hcn4-GFP::Tbx1Cre-RFP* gastruloids at 168h, showing the cardiac portion in the anterior domain.  $n=4$  independent experiments. F-H, Expression of endocardial genes. A: anterior; P: posterior. Scale bars, 100 $\mu$ m.
